# Supplementary material for: Genome-wide identification of NHX (Na+/H+ antiporter) gene family in Cucurbita L. and functional analysis of CmoNHX1 under salt stress
Source: Front Plant Sci. 2023 Mar 14;14:1136810. doi: 10.3389/fpls.2023.1136810 (PMC10043322; doi:10.3389/fpls.2023.1136810)
Supplement: Supplementary file 1 [file DataSheet_1.xlsx]

## Sheet: Table S1
Table S1 The coding sequence and protein sequence for 26 NHXs in Cucurbita genus.
Gene ID	Gene Name	The coding sequence	The protein sequence
CmoCh01G011470.1	CmoNHX1	ATGGGAGTGCTCGACACTGTCAAGAACATCGGCAGCGACCACGCCCCGGTCGTCCCCTTG	MGVLDTVKNIGSDHAPVVPLTLFVAVLCLCLVIGHLLEENRWVNESITAIIIGGVTGTIILVCSKGKDSHILTFNEEVFFIYLLPPIIFNAGFQVKKKQFFHNFLTIMLFGVIGVFISALIITSGSQWLFPRMGFHGLSARDYIAIGAIFSSTDTVCTLQVLHQEETPLLYSLVFGEGVVNDATSVVLFNAVQKIDITRLNSKTALHVFGDFCYLFSTSTVLGVTAGLLTAYILKTLYFGRHSSVRELAIMVLMAYLSYMLAELLELSGILTVFFCGVIMSHYAWHNVTDSSKITTRHVFSMMSFVAETAIFLYVGMDALDIEKWKITKLSLWKLVGTYSITVFLILLGRAAFVFPLSAISNYFNKREDRSSSSSIITFKQQIIIWWAGLMRGAVSIAL…
CmoCh04G022490.1	CmoNHX2	ATGGCGGAAGTAGAATTGCTGGAAATGTTTACAAACCGAGAGCTGGAAGAAGGAGCCATT	MAEVELLEMFTNRELEEGAIGSSDWNPTDAVLFVGLSLVLGIACRHLLRGTRVPYTVALLVLGIILGSIEYGTHHRLGKIGDGIRLWAKIDPDLLLAVFLPALLFESSFSMEVHQIKRCLAQMILLAGPGVLISTFLLGSAFKLTFPYNWNWKTSLLLGGLLSATDPVAVVALMKELGASKKLNTIIEGESLMNDGTAIVVYQLFYQMVLGKSFNWGAIIKYLTQVSLGALGIGLAFGIASVLWLGFIFNDTVIEIALTLAVSYIAYFTAQEGADVSGVLAVMTLGMFHAAVARTAFKGDGQQSLHHFWEMVAYIANTLIFILSGVVIAEGVLGSEGILNDGASWGFLILLYAYVQASRVMVVGVLYPFLRYFGYGLDWKEATILTWSGLRGAVALALS…
CmoCh08G011760.1	CmoNHX3	ATGGCGTCTGAAATGATTGTCGAATCAGGCTCGTCGATAATAGATTTTGGGATGGAGTTA	MASEMIVESGSSIIDFGMELVADHTSVVSLNLFVALLCGCIVVGHLLEENRWINESITALVIGLCTGIIILLTTRGKSSHLFLFNEELFFIYLLPPIIFNAGFQVKKKQFFRNIMTIVLFGAFGTLISFCIISLGALHFFQKMNIGSLDLGDYLAIGAIFSATDSVCTLQVLNQDETPLLYSLVFGEGVVNDATSVVLFNAIQNFDLSHMNSSIILQFIGNFLYLFIASTVLGILVGLLSAYIIKKLYFGRHSTDREVALMILMAYFSYMLAELFYLSAILTVFFCGIVMSHYTWHNVTESSRVTTKHAFATLSFVAEIFIFLYVGMDALDIEKWRFVSHSPGKSIGVSSILLGLVLVGRAAFVFPLSSLSNLTKKSSHEKLNLEQQVTIWWAGLMRGA…
CmoCh10G011690.1	CmoNHX4	ATGACACCCATTTTGAACTATGTTGTGTCCAAATGGCAAGCGTTGTCCACTTCTGATCAT	MTPILNYVVSKWQALSTSDHASVVSINLFVALLCACIVIGHLLEETRWMNESITALLIGMFAGIVILLVSRGKSSHLLLFSEDTFFIYLLPPIIFNAGFQVKKKQFFVNFMTIMLFGAIGTLVSCFIISLGAFQFFKKMDVGSLDIADILAIGAIFAATDSVCTLQILSQDETPLLYSLVFGEGVVNDATSVVLFNAIQSIDLSNIDARVAIHFLGSFFYLFSTSTLLGVFVGLLSAYIIRKLYFGRHSTDREVALMILMAYLSYMLAELLDLSGILTVFFCGIVMSHYTWHNVTESSRVTTNPGTSVAVSAMLLGLVMVGRAAFVFPLSFLSNLAKKSADEKITFREQVIIWWAGLMRGAVSIALAYHQFTRAGHTQLRGNAMMITSTVTVVLFSTMV…
CmoCh11G013070.1	CmoNHX5	ATGACACCCGTTTGGAGCTATGTTCTGTCCAAGTGGCAAACGTTGTCCACTTCTGATCAC	MTPVWSYVLSKWQTLSTSDHASVVSINLFVALLCACIVIGHLLEETRWMNESITALFIGMFTGVIILLVSGGKSSHLLLFSEDIFFIYLLPPIIFNAGFQVKKKQFFVNFITIMLFGAIGAFQIFQRMDVGTLDIADILAIGAIFAATDSVCTLQILNQDETPLLYSLVFGEGVVNDATSVVLFNAIQSLDLSKVDARVALHFIGSFFYLFSTSTLLGVFVGLLSAYTIKKLYFGRHSTDREVALMMLMAYLSYMLAELLDLSGILTVFFCGIVMSHYTWHNVTESSRVTTKHAFATLSFISETFIFVYVGMDALDIEKWSYVSDSPGTSVAVSAILLALVMVGRAAFVFPLSFLSNLVKKSASEKITFRQQVIIWWAGLMRGAVSIALAYHQVFGILT…
CmoCh13G003410.1	CmoNHX6	ATGTTGAGCCTTAATTCTCAGAACCTTTTTAAGTATGCTGGATTGGACATTGACAATCTT	MLSLNSQNLFKYAGLDIDNLQNLECCLFVLFPYFSYMLAEGFGLSGIVSILFTGMVMKHYTYSNLSESSQQFVAEFFHLISSLAETFIFIYMGLDIAMEQHSWSHVGFIFFSILFIGVARAANVFSCAYLVNLVRPAHRKIPSNHQKALWYSGLRGAMAFALALQSIHDLPDGHGQTIFTATTAIVVLTVLLIGGSTGTMLEALQVVGDSDDHEYSLTENSDVSNGYIAPDSDEGSSRSRIKMKLREFHESTASFTALNRNYLTPFFKSRSGDDEENDNIKSAEKKVNGLKTEAVVWILG
CmoCh13G003420.1	CmoNHX7	ATGCCAATCACAAGCTGCACGCGCGACAGCCATGCGCGGACCACTTCACGCAGTCGCGGG	MPITSCTRDSHARTTSRSRGSGRFGQQMSSLWFDLVFVGDTRRRSTGAVSLQSMLDADFSTPVVGDLASSSTETTQFPERPETSADDRCSIGRSMGMEEEAQIMLISPAEPKGSPVKDQQAAGVGILLQIMMLVLSFVLGHVLRRHRVYFLPEASASLLIGLIVGGLANISNTETNIRAWFNFHEEFFFLFLLPPIIFQSGFSLSPKPFFSNFGAIVTFAILGTFIASVVTGGLVYLGGLMFLMYRLPFVECLMFGALISATDPVTVLSIFQELGTDVNLYALVFGESVLNDAMAISLYRTMSLVRSHAYSGKNFFFVIVRFLETFVGSLSAGLGVGFTSALISFYAQSYLCCL
CmoCh17G011050.1	CmoNHX8	ATGGATTCATTTTTGGGAAACACCGTGATGAAGTTGGCTTTGAAATCAGACCCTGAAGAG	MDSFLGNTVMKLALKSDPEEHRVALFVLLLCACIVIGHLLEKSRWINESVTAIFIGLFTGTLILLTTKGRNSRILVFSEELFFIYVLPPIIFNAGFQVKKKQFFRNFLMIMLFGAVGTAISFFIISLGSLHIFKKLDIGFLDVGDYFALGAILSATDSVCTLQVLNQDETPLLYSLVFGEGVVNDATSVVLFKAIQRFDLSHITSSNAIQLLGNFSYLFFMSTLLGVIVGLSSAYIIKKLYFGRHSTDREVALMILMPYLSYMTAELCNLSGILTMFFCGIVMSHYTWHNVTESSRVTTKHTFATLSFVSEIFIFLYVGMDALDIEKWKIVGRRPWTSAGVSLILLGLVLAARAAFVFPLSFISNLTRKSQSDKIGFKQQVTIWWAGLMRGAVSVALAY…
CmoCh18G006110.1	CmoNHX9	ATGATGGTGAGGAATTTGGTGCTGTTTTTGCTTTTTGTCACTGTCATTGCTCCGATTGTG	MMVRNLVLFLLFVTVIAPIVLYTHRLGSFNFSSSRGEFLEDFSSFTLSSHSEHLNILPLESSRTLKEPVGTVYSNNTAHPEPDASATEHNSTDVQGANQDLQLPESREHKSTRALSTTNENVSSIRENPLRQITDQHAQKNLRKGSLVQFDTKRVKVSKREQQSIQSTDLKSRESSKSEKGNDEAVAPNARVQYLKDQLVQAKLYLSLSATRNNVNFIRQLRQRMKEVQRTLGRANKDSQLPRNALEKLRAMDGILNRGKQIQDDCASMVKKVRAMLQSTEEQLRVHKKQALFLSQLTAKTLPKGLHCLPLRLTTEYYSLNYSQRPFPNQEKLEDSSLYHYALFSDNVLAAAAVVNSTIAHAKDASKHVLHIVTDQLNYAAMRMWFLVNLPGKATIEVQ…
CmaCh01G011010.1	CmaNHX1	ATGGGAGTGCTCGAAACTGTCAAGAACATCGGCAGCGACCACGCCCCGGTCGTCCCCTTGACGTTGTTCGTTGCCGTTCTTTGTTTATGCTTGGTTATTGGCCATTTGCTCGAAGAAAATCGTTGGGTTAATGAGTCCATCACTGCCATTATCATTGGAGGTGTTACTGGCACGATCATATTGGTCTGTAGCAAGGGAAAAGATTCTCATATCCTAACTTTTAATGAGGAAGTGTTCTTCATGTATCTCCTTCCCCCAATAATTTTCAATGCTGGATTTCAAGTTAAAAAGAAGCAGTTCTTCCACAACTTCTTGACCATTATGCTGTTCGGGGTGATTGGTGTTTTTATATCTGCACTCATTATAACATCTGGTAGCCAGTGGCTGTTTACAAGGATG…	MGVLETVKNIGSDHAPVVPLTLFVAVLCLCLVIGHLLEENRWVNESITAIIIGGVTGTIILVCSKGKDSHILTFNEEVFFMYLLPPIIFNAGFQVKKKQFFHNFLTIMLFGVIGVFISALIITSGSQWLFTRMGFHGLSARDYIAIGAIFSSTDTVCTLQVLHQEETPLLYSLVFGEGVVNDATSVVLFNAVQKIDITRLNSKTALHVFGDFCYLFSTSTILGVTAGLLTAYILKTLYFGRHSSVRELAIMVLMAYLSYMLAELLELSGILTVFFCGVIMSHYAWHNVTDSSKITTRHVFSMMSFVAETAIFLYVGMDALDIEKWKITKLSLWKLVGTYSITVFLILLGRAAFVFPLSAISNYFNKCEDRSSSSSIITFKQQIIIWWAGLMRGAVSIAL…
CmaCh04G021540.1	CmaNHX2	ATGGCGGAAGTAGAATTGTTGGAAATGTTTACAAACCGAGAGCTGGAAGAAGGAGCCATTGGTTCGTCTGATTGGAATCCAACTGATGCTGTGCTGTTCGTTGGACTGAGTTTGGTGCTTGGAATCGCTTGCAGACACTTACTGCGAGGCACCAGAGTTCCTTATACAGTTGCCTTGCTTGTTCTTGGCATAATTCTTGGATCCATTGAATATGGCACACACCATCGATTGGGAAAGATAGGGGATGGCATCCGTCTATGGGGAACAATTGATCCTGATCTATTATTGGCTGTTTTCCTTCCTGCTCTGCTGTTTGAGAGTTCCTTTTCAATGGAAGTGCACCAAATAAAGAGGTGTCTGGCCCAAATGATCTTATTAGCTGGTCCAGGTGTTTTAATT…	MAEVELLEMFTNRELEEGAIGSSDWNPTDAVLFVGLSLVLGIACRHLLRGTRVPYTVALLVLGIILGSIEYGTHHRLGKIGDGIRLWGTIDPDLLLAVFLPALLFESSFSMEVHQIKRCLAQMILLAGPGVLISTFLLGSAFKLTFPYNWNWKTSLLLGGLLSATDPVAVVALMKELGASKKLNTIIEGESLMNDGTAIVVYQLFYQMVLGKSFNWGAIIKYLTQVSLGALGIGLAFGIASVLWLGFIFNDTVIEIALTLAVSYIAYFTAQEGVDVSGVLAVMTLGMFHAAVARTAFKGDGQQSLHHFWEMVAYIANTLIFILSGVVIAEGVLGSEGILNDGASWGFLILLYAYVQASRVIVVGVLYPFLRYFGYGLDWKEATILTWSGLRGAVALALS…
CmaCh08G012010.1	CmaNHX3	ATGGCGTCTGAAATGATTGTCGAATCAGGCTCGTCGATAATAGATTTTGGGATGGAGTTAGTCGCGGATCATACTTCGGTGGTTTCTTTAAACTTATTTGTAGCTCTTCTTTGTGGTTGCATTGTTGTTGGTCATTTGTTAGAGGAAAACCGATGGATCAACGAGTCCATTACAGCCCTTGTCATTGGGTTGTGTACCGGCATCATCATATTGCTAACAACTAGAGGGAAAAGTTCGCATTTATTTTTGTTCAATGAAGAGCTTTTCTTTATCTATCTCCTTCCGCCTATCATTTTCAATGCCGGTTTCCAGGTCAAGAAGAAGCAGTTTTTCCGCAACATCATGACCATAGTGCTTTTTGGTGCTTTTGGCACTCTCATATCCTTCTGTATTATATCA…	MASEMIVESGSSIIDFGMELVADHTSVVSLNLFVALLCGCIVVGHLLEENRWINESITALVIGLCTGIIILLTTRGKSSHLFLFNEELFFIYLLPPIIFNAGFQVKKKQFFRNIMTIVLFGAFGTLISFCIISLGALHFFQKMNIGSLDLGDYLAIGAIFSATDSVCTLQVLNQDETPLLYSLVFGEGVVNDATSVVLFNAIQNFDLSHMNSSIILQFIGNFLYLFIASTVLGILVGLLSAYIIKKLYFGRHSTDREVALMILMAYFSYMLAELFYLSAILTVFFCGIVMSHYTWHNVTESSRVTTKHAFATLSFVAEIFIFLYVGMDALDIEKWRFVSHSPGKSIGVSSILLGLVLVGRAAFVFPLSSLSNLTKKSSHEKLNLEQQVTIWWAGLMRGA…
CmaCh10G010920.1	CmaNHX4	ATGACACCCATTTTGAACTATGTTGTGTCCAAATGGCAAGCGTTGTCCACTTCTGATCATGCCTCTGTGGTTTCCATCAACTTATTTGTGGCACTTCTCTGTGCTTGTATTGTGATTGGTCATCTTCTTGAGGAGACCCGATGGATGAATGAGTCGATCACTGCACTCTTGATTGGTATGTTTGCTGGAATAGTCATTTTACTGGTCAGTCGTGGGAAAAGTTCGCATTTGTTGCTTTTCAGCGAAGATACATTCTTTATTTATCTTCTACCACCGATTATATTCAATGCGGGGTTTCAGGTGAAAAAGAAGCAGTTCTTTGTCAACTTTATGACAATTATGCTGTTTGGTGCAATTGGTACATTAGTCTCGTGTTTCATCATCTCGTTAGGAGCTTTT…	MTPILNYVVSKWQALSTSDHASVVSINLFVALLCACIVIGHLLEETRWMNESITALLIGMFAGIVILLVSRGKSSHLLLFSEDTFFIYLLPPIIFNAGFQVKKKQFFVNFMTIMLFGAIGTLVSCFIISLGAFQFFKKMDVGSLDIADILAIGAIFAATDSVCTLQILSQDETPLLYSLVFGEGVVNDATSVVLFNAIQSIDLSNIDARVAIHFLGSFFYLFSTSTLLGVFVGLLSAYIIRKLYFGRHSTDREVALMILMAYLSYMLAELLDLSGILTVFFCGIVMSHYTWHNVTESSRVTTKHAFATLSFISESFIFVYVGMDALDIEKWSFVSDSPGTSVAVSAMLLGLVMVGRAAFVFPLSFLSNLAKKSADEKITFREQVIIWWAGLMRGAVSIA…
CmaCh11G012510.1	CmaNHX5	ATGTCATGCGTGAGAGTTATGTTGTTGAGATGGAAAGTCCGGAGGCCTAGATTCTGCTATAAAGGAAGTGGAGATATTTTGAATTTGGAACCGATTTTTTCAAAAGAATTGTTTTCTGGACAAACCGATTCTTCCATCGAAGAGGCTGATAAAATGACACCCGTTTGGAGCTATGTTATGTCCAAGTGGCAAACGTTGTCCACTTCTGATCATGCCTCTGTGGTTTCCATTAACTTATTTGTAGCTCTTCTCTGTGCTTGTATTGTGATTGGTCATCTTCTTGAGGAGACCCGGTGGATGAATGAGTCGATCACTGCCCTCTTCATTGGTATGTTTACCGGAGTCATCATTTTACTGGTTAGTGGTGGGAAAAGTTCGCATTTATTGCTCTTCAGCGAA…	MSCVRVMLLRWKVRRPRFCYKGSGDILNLEPIFSKELFSGQTDSSIEEADKMTPVWSYVMSKWQTLSTSDHASVVSINLFVALLCACIVIGHLLEETRWMNESITALFIGMFTGVIILLVSGGKSSHLLLFSEDIFFIYLLPPIIFNAGFQVKKKQFFVNFITIMLFGAIGTLVSCSIISLGAFQIFQRMDVGSLDIADILAIGAIFAATDSVCTLQILNQDETPLLYSLVFGEGVVNDATSVVLFNAIQSLDLSKVDARVALHFIGSFFYLFSTSTLLGVFVGLLSAYTIKKLYFGRHSTDREVALMMLMAYLSYMLAELLDLSGILTVFFCGIVMSHYTWHNVTESSRVTTKHAFATLSFISETFIFVYVGMDALDIEKWSYVSDSPGTSVAVSAIL…
CmaCh13G003230.1	CmaNHX6	ATGTTGAGCCTTAATTCTCAGAACCTTTTTAAGTATGCTGGATTGGACATTGACAATCTTCAAAATTTGGAGTGCTGTCTTTTTGTTCTTTTCCCGTATTTCTCGTACATGCTTGCAGAAGGTTTTGGTTTGTCTGGTATTGTATCAATATTGTTCACAGGAATGGTGATGAAGCATTATACATATTCAAACTTATCAGAGCCTTCACAACAATTTGTTGCGGAATTCTTTCACTTAATATCATCTCTGGCAGAGACATTTATATTTATATATATGGGCTTAGATATTGCAATGGAGCAACATAGCTGGTCACATGTTGGATTCATTTTTTTCTCAATTCTATTTATTGGTGTCGCAAGGGCTGCAAATGTCTTTTCTTGTGCATATTTAGTCAACTTA…	MLSLNSQNLFKYAGLDIDNLQNLECCLFVLFPYFSYMLAEGFGLSGIVSILFTGMVMKHYTYSNLSEPSQQFVAEFFHLISSLAETFIFIYMGLDIAMEQHSWSHVGFIFFSILFIGVARAANVFSCAYLVNLVRPAHRKIPSNHQKALWYSGLRGAMAFALALQSIHDLPDGHGQTIFTATTAIVVLTVLLIGGSTGTMLEALQVVGDNDDHEYSLTENSDVSNGYIAPDSDEGSSRSRIKMKLREFHESTASFTALNRNYLTPFFKSRSGDDEENDNRALIRGS
CmaCh13G003240.1	CmaNHX7	ATGGGTATGGAGGAAGAAGCACAAATTATGCTCATCTCTCCGGCGGAGCCAAAAGGTAGTCCAGTCAAGGACCAGCAAGCCGCCGGAGTTGGAATCCTCCTTCAGATCATGATGCTCGTTCTCTCTTTCGTTCTCGGCCATGTTCTTCGCCGGCATAGAGTCTATTTTCTTCCCGAAGCCAGTGCTTCTCTTCTCATCGGTTTAATCGTCGGCGGGCTTGCCAACATTTCCAATACTGAAACTAACATCAGGGCGTGGTTCAACTTTCACGAAGAATTTTTCTTCCTTTTCCTTTTGCCTCCGATCATCTTATATCCTTCATCAGGATTTAGTCTCTCACCTAAGCCTTTCTTCTCAAACTTTGGGGCGATTGTGACGTTTGCTATCTTGGGAACCTTT…	MGMEEEAQIMLISPAEPKGSPVKDQQAAGVGILLQIMMLVLSFVLGHVLRRHRVYFLPEASASLLIGLIVGGLANISNTETNIRAWFNFHEEFFFLFLLPPIILYPSSGFSLSPKPFFSNFGAIVTFAILGTFIASVVTGGLVYLGGLMFLMYRLPFVECLMFGALISATDPVTVLSIFQELGTDVNLYALVFGESVLNDAMAISLYRTMSLVRSHAYSGKNFFFVIVRFLETFVGSLSAGLGVGFTSALISFYAQSYLCCL
CmaCh17G011310.1	CmaNHX8	ATGGATTCATTTTTGGGAAACACCGTGATGAAGTTGGCTTTGAAATCAGACCCTGAAGAGCATCGCGTTGCATTGTTTGTATTACTTCTTTGTGCTTGTATTGTAATTGGGCATCTTCTTGAGAAAAGTCGTTGGATAAATGAATCAGTCACTGCAATTTTCATTGGTCTTTTCACTGGAACTCTCATCTTATTAACAACCAAAGGCAGAAACTCACGTATCCTAGTGTTTAGTGAAGAGCTTTTCTTCATTTATGTTCTTCCACCCATAATTTTTAATGCTGGGTTTCAGGTGAAAAAGAAACAGTTCTTTCGGAACTTTCTAATGATCATGTTGTTTGGGGCTGTTGGTACTGCGATTTCATTTTTCATCATATCACTTGGTTCACTACATATATTC…	MDSFLGNTVMKLALKSDPEEHRVALFVLLLCACIVIGHLLEKSRWINESVTAIFIGLFTGTLILLTTKGRNSRILVFSEELFFIYVLPPIIFNAGFQVKKKQFFRNFLMIMLFGAVGTAISFFIISLGSLHIFKKLDIGFLDVGDYFALGAILSATDSVCTLQVLNQDETPLLYSLVFGEGVVNDATSVVLFKAIQRFDLSHITSSNAIQLLGNFSYLFFMSTLLGVIVGLSSAYIIKKLYFGRHSTDREVALMILMPYLSYMTAELCNLSGILTMFFCGIVMSHYTWHNVTESSRVTTKHTFATLSFVSEIFIFLYVGMDALDIEKWKIVGRRPWTSAGVSLILLGLVLAARAAFVFPLSFISNLTRKSQSDKIGFKQQVTIWWAGLMRGAVSVALAY…
CmaCh18G006240.1	CmaNHX9	ATGACGTTTGTTCCTTCCAAAAAGTTAGATCCTATTAAATTCTGGAGAAGCAAGTTTCCGAATCCTGTTATTGGCGTCATCTTCATCAACATATCAAATTCCGAAACGGCCACAGACTTGAGCAGCAGAAGACGATCCATTATGGGCATGGAGGACGAAGCCCAAATTATGGTCATCTCTCCGGCAGAGCCCAAAGGCAGTCCGGTTAAGGATCAACAAGCTGCCGGAGTTGGCATCCTCCTTCAGATCATGATGCTTGTTCTCTCTTTCGTTCTCGGCCATGTCCTTCGTCGCCATAGGCTCTATTTTCTTCCCGAAGCCAGTGCTTCTCTTCTCATCGGTTTAATCGTCGGCGGCCTTGCCAACATTTCGAATACTCAAACTAACATCAGGGCGTGG…	MTFVPSKKLDPIKFWRSKFPNPVIGVIFINISNSETATDLSSRRRSIMGMEDEAQIMVISPAEPKGSPVKDQQAAGVGILLQIMMLVLSFVLGHVLRRHRLYFLPEASASLLIGLIVGGLANISNTQTNIRAWFNFHEEFFFLFLLPPIIFQSGFSLSPKPFFSNFGAIVTFAILGTFIASVVTGGLVYLGGLMFLMYRLPFVECLMFGALISATDPVTVLSIFQELGTDVNLYALVFGESVLNDAMAISLYRTMSLVRSHAYHGKNFFFVIVRFLETFVGSMSAGVGVGFTSALISFYEQCLDIDNLQNLECCIFVLFPYFSYMLAEGFGLSGIVSILFTGMVMKHYTYSNLSESSQQFVAGFFHLFSSLAETFIFIYMGLDIAMEQHSWSHIGFIFF…
Cp4.1LG02g00760.1	CpNHX1	ATGGGAGTGCTCGAAACTGTCAAGAACATCGGCAGCGACCACGCCCCGGTCGTCCCCTTGACGTTGTTCGTTGCTGTTCTTTGTTTATGCTTGGTTATTGGCCATTTGCTCGAAGAAAATCGTTGGGTTAATGAATCCATCACTGCCATTATCATTGGAGGTGTTACTGGCACGATCATATTGGTCTGTAGCAAGGGAAAAGATTCTCATATCCTAACTTTTAATGAGGAAGTGTTCTTCATATATCTCCTTCCCCCAATAATTTTCAATGCTGGATTTCAAGTTAAAAAGAAGCAGTTCTTCCACAACTTCTTGACCATTATGCTGTTCGGGGTGATTGGTGTTTTTATATCTGCACTCATTATAACGTCTGGTAGCCAGTGGCTGTTTCCAAGGATG…	MGVLETVKNIGSDHAPVVPLTLFVAVLCLCLVIGHLLEENRWVNESITAIIIGGVTGTIILVCSKGKDSHILTFNEEVFFIYLLPPIIFNAGFQVKKKQFFHNFLTIMLFGVIGVFISALIITSGSQWLFPRMGFHGLSARDYIAIGAIFSSTDTVCTLQVLHQEETPLLYSLVFGEGVVNDATSVVLFNAVQKIDITRLNSKTALHVFGDFCYLFSTSTVLGVTAGLLTAYILKTLYFGRHSSVRELAIMVLMAYLSYMLAELLELSGILTVFFCGVIMSHYAWHNFKDNHQASTSTTSRCMLKVTISVFQWFLHVFSMMSFVAETAIFLYVGMDALDIEKWKITKLSLWKLVGTYTITVFLILLGRAAFVFPLSAISNYFNKREDRSSSSSIITFKQ…
Cp4.1LG04g08510.1	CpNHX2	ATGACACCCGTTTGGAGCTATGTTATGTCCAAGTGGCAAACGTTGTCCACTTCTGATCACGCCTCTGTGGTTTCCATTAACTTATTTGTAGCTCTTCTCTGTGCTTGTATTGTGATTGGTCATCTTCTTGAGGAGACCCGGTGGATGAATGAGTCGATCACTGCCCTCTTCATTGGTATGTTTACCGGAGTCATCATTTTACTGGTCAGTGGTGGGAAAAGTTCGCATTTATTGCTCTTCAGCGAAGACATATTCTTCATTTATCTTCTGCCACCTATCATATTCAATGCTGGGTTTCAGGTGAAAAAGAAGCAGTTCTTTGTTAACTTCATTACAATTATGCTGTTTGGTGCAATTGGTACATTAGTCTCTTGTTCAATCATCTCATTAGGAGCTTTT…	MTPVWSYVMSKWQTLSTSDHASVVSINLFVALLCACIVIGHLLEETRWMNESITALFIGMFTGVIILLVSGGKSSHLLLFSEDIFFIYLLPPIIFNAGFQVKKKQFFVNFITIMLFGAIGTLVSCSIISLGAFQIFQRMDVGTLDIADILAIGAIFAATDSVCTLQILNQDETPLLYSLVFGEGVVNDATSVVLFNAIQSLDLSKVDARVALHFIGSFFYLFSTSTLLGVFVGLLSAYTIRKLYFGRHSTDREVALMMLMAYLSYMLAELLDLSGILTVFFCGIVMSHYTWHNVTESSRVTTKHAFATLSFISETFIFVYVGMDALDIEKWSYVSDSPGTSVAVSAILLGLVMVGRAAFVFPLSFLSNLVKKSASEKITFRQQVIIWWAGLMRGAVSIA…
Cp4.1LG10g12560.1	CpNHX3	TTCTGGAGAAGCGAGTTTCCGAATCCTGTTATTCGCGTCATCATCTTCATCAACGTATCAAATTCCGAAACAGCCACAGACTTGAGCAGCAGAAGAAGATCCATCATGGGCATGGAGGACGAAGCCCAAATTATGGTCATCTCTCCGGCAGAGCCCAAAGGCAGTCCGGTTAAGGATCAACAAGCTGCCGGAGTTGGCATCCTCCTTCAGATCATGATGCTTGTTCTCTCTTTCGTTCTCGGCCATGTCCTTCGCCGCCATAGACTCTATTTTCTTCCCGAAGCCAGTGCTTCTCTTCTCATCGGTTTAATCGTCGGCGGCCTTGCCAACATTTCGAATACTCAAACTAACATCAGGGCGTGTCTCTCACCTAAACCTTTCTTCTCAAACTTTGGGGCA…	FWRSEFPNPVIRVIIFINVSNSETATDLSSRRRSIMGMEDEAQIMVISPAEPKGSPVKDQQAAGVGILLQIMMLVLSFVLGHVLRRHRLYFLPEASASLLIGLIVGGLANISNTQTNIRACLSPKPFFSNFGAIVTFAILGTFIASVVTGGLVYLGGLMFLMYRLPFVECLMFGALISATDPVTVLSIFQELGTDVNLYALVFGESVLNDAMAISLYRTMSLVRSHAYHGKNFFFVIVRFLETFVGSMSAGLDIDKYMLAEGFGLSGIVSILFTGMVMKHYTYSNLSESSQQFVAEFFHLFSSLAETFMAANVFSCAYLVNLVRPAHRQVPPKHQKALWYCGLRGAMAFALALQSIHDLPDGHGQTIFTATTAIVILTVLLIGGSTGTMLEVLQVVGGN…
Cp4.1LG11g09280.1	CpNHX4	ATGACACCCATTTTGAACTATGTTGTGTCCAAATGGCAAGCGTTGTCCACTTCTGATCATGCCTCTGTGGTTTCCATCAACTTATTTGTGGCACTTCTCTGTGCTTGTATTGTGATTGGTCATCTTCTTGAGGAGACCCGATGGATGAATGAGTCGATCACTGCACTCCTGATTGGTATGTTTGCTGGAATAGTCATTTTACTGGTCAGTCGTGGGAAAAGTTCGCATTTGTTGCTTTTCAGCGAAGATACATTCTTTATTTATCTTCTGCCACCGATTATATTCAATGCGGGGTTTCAGGTGAAAAAGAAGCAGTTCTTTGTCAACTTTATGACAATTATGCTGTTTGGCGCAATTGGTACATTAGTCTCGTGTTTCATCATCTCGTTAGGAGCTTTT…	MTPILNYVVSKWQALSTSDHASVVSINLFVALLCACIVIGHLLEETRWMNESITALLIGMFAGIVILLVSRGKSSHLLLFSEDTFFIYLLPPIIFNAGFQVKKKQFFVNFMTIMLFGAIGTLVSCFIISLGAFQFFKKMDVGSLDIADILAIGAIFAATDSVCTLQILSQDETPLLYSLVFGEGVVNDATSVVLFNAIQSIDLSNIDARVAIHFLGSFFYLFSTSTLLGVFVGLLSAYIIRKLYFGRHSTDREVALMILMAYLSYMLAELLDLSGILTVFFCGIVMSHYTWHNVTESSRVTTNPGTSVAVSAMLLGLVMVGRAAFVFPLSFLSNLAKKSADEKITFREQVIIWWAGLMRGAVSIALAYHQFTRAGHTQLRGNAMMITSTVTVVLFSTMV…
Cp4.1LG12g05410.1	CpNHX5	ATGGATTCATTTTTGGGAAACACCGTGATGAAGTTGGCTTTGAAATCAGACCCTGAAGAGCATCGCGTTGCATTGTTTGTATTACTTCTTTGTGCTTGTATTGTAATTGGGCATCTTCTTGAGAAAAGTCGTTGGATAAATGAATCAGTCACTGCTATTTTCATTGGTCTTTTCACTGGAACTCTCATCTTATTAACAACCAAAGGCAGAAACTCACGTATCCTAGTGTTTAGTGAAGAGCTTTTCTTCATTTATGTTCTTCCACCCATAATTTTTAATGCTGGGTTTCAGGTGAAAAAGAAACAGTTCTTTCGGAACTTTCTAATGATCATGTTGTTTGGGGCTGTTGGTACTGCGATCTCATTTTTCATCATATCACTTGGTTCACTACATATATTC…	MDSFLGNTVMKLALKSDPEEHRVALFVLLLCACIVIGHLLEKSRWINESVTAIFIGLFTGTLILLTTKGRNSRILVFSEELFFIYVLPPIIFNAGFQVKKKQFFRNFLMIMLFGAVGTAISFFIISLGSLHIFKKLDIGFLDVGDYFALGAILSATDSVCTLQVLNQDETPLLYSLVFGEGVVNDATSVVLFKAIQRFDLSHITSSNAIQLLGNFSYLFLMSTLLGVIVGLSSAYIIKKLYFGRQALSFLPLFIKFISFAKRIPMHSTDREVALMILMPYLSYMTAELCNLSGILTMFFCGIVMSHYTWHNVTESSRVTTKHTFATLSFVSETFIFLYVGMDALDIEKWKIVGRRPWTSAGVSLILLGLVLAARAAFVFPLSFISNLTRKSQSDRIGFK…
Cp4.1LG17g00770.1	CpNHX6	ATGGCGTCTGAAATGATTGTCGAATCAGGCTCGTCGATAATAGATTTTGGGATGGAGTTAGTCGCGGATCATACTTCGGTGGTTTCTTTAAACTTATTTGTAGCTCTTCTTTGTGGTTGCATTGTTGTTGGTCATTTGTTAGAGGAAAACCGATGGATCAACGAGTCCATTACAGCCCTTGTCATTGGGTTGTGTACCGGCATCATCATATTGCTAACAACAAGAGGGAAAAGTTCGCATTTATTTTTGTTCAATGAAGAGCTTTTCTTTATCTATCTCCTTCCGCCTATCATTTTCAATGCCGGTTTCCAGGTCAAGAAGAAGCAGTTTTTCCGCAACATCATGACCATAGTGCTTTTTGGTGCTTTTGGCACTCTCATATCCTTCTGTATTATATCA…	MASEMIVESGSSIIDFGMELVADHTSVVSLNLFVALLCGCIVVGHLLEENRWINESITALVIGLCTGIIILLTTRGKSSHLFLFNEELFFIYLLPPIIFNAGFQVKKKQFFRNIMTIVLFGAFGTLISFCIISLGALHFFQKMNIGSLDLGDYLAIGAIFSATDSVCTLQNFDLSHMNSSIILQFIGNFLYLFIASTVLGILVGLLSAYIIKKLYFGRHSTDREVALMILMAYFSYMLAELFYLSAILTVFFCGIVMSHYTWHNVTESSRVTTKHAFATLSFVAEIFIFLYVGMDALDIEKWRFVSHSPGKSIGVSSILLGLVLVGRAAFVFPLSSLSNLTKKSSHEKLNLEQQVTIWWAGLMRGAVSMALAYNQVCRRTYQN
Cp4.1LG17g00950.1	CpNHX7	ATGGCGTCTGAAATGATTGTCGAATCAGGCTCGTCGATAATAAATTTTGGGATGGAGTTAGTCGCGGATCATACTTCGGTGGTTTCTTTAAACTTATTTGTAGCTCTTCTTTGTGGTTGCATTGTCGTTGGTCATTTGTTAGAGGAAAACCGATGGATCAACGAGTCCATTACAGCCCTTGTCATTGGGTTGTGTACCGGCATCATCATATTGCTAACAACTAGAGGGAAAAGTTCGCATTTATTTTTGTTCAATGAAGAGCTTTTCTTTATCTATCTCCTTCCGCCTATCATTTTCAATGCCGGTTTCCAGGTCAAGAAGAAGCAGTTTTTCCGCAACATCATGACCATAGTGCTTTTTGGTGCTTTTGGCACTCTCATATCCTTCTGTATTATATCA…	MASEMIVESGSSIINFGMELVADHTSVVSLNLFVALLCGCIVVGHLLEENRWINESITALVIGLCTGIIILLTTRGKSSHLFLFNEELFFIYLLPPIIFNAGFQVKKKQFFRNIMTIVLFGAFGTLISFCIISLGALHFFQKMNIGSLDLGDYLAIGAIFSATDSVCTLQVRNSSNFDLSHMNSSIILQFIGNFLYLFIASTVLGILVGLLSAYIIKKLYFGRHSTDREVALMILMAYFSYMLAELFYLSAILTVFFCGIVMSHYTWHNVTESSRVTTKHAFATLSFVAEIFIFLYVGMDALDIEKWRFVSHSPGKSIGVSSILLGLVLVGRAAFVFPLSSLSNLTKKSSHEKLNLEQQVTIWWAGLMRGAVSMALAYNQFTRSGHTHLPGNAIMITST…
Cp4.1LG20g06710.1	CpNHX8	ATGACAAGATTTTGGGGGAGCGACTTTTTAACTCCCGTTGTTGGCGACTTGGCGTCATCTTCCACAGAGACAACCCAATTTCCTGAACGCCCAGAAACTTCTGCAGACGATCGGTGCAGCATCGGAAGATCCATGGGCATGGAGGAAGAAGCACAAATTATGCTCATCTCTCCGGCGGAGCCCAAAGGTAGTCCAGTCAAGGACCAGCAAGCCGCCGGAGTTGGAATCCTCCTTCAGATCATGATGCTTGTTCTCTCTTTCGTTCTCGGTCATGTTCTTCGCCGGCATAGAGTCTATTTTCTTCCCGAAGCCAGTGCTTCTCTTCTCATCGGTTTAATCGTCGGCGGGCTTGCCAACATTTCCAATACTGAAACTAACATCAGTGGCGAGGTCTCGTGT…	MTRFWGSDFLTPVVGDLASSSTETTQFPERPETSADDRCSIGRSMGMEEEAQIMLISPAEPKGSPVKDQQAAGVGILLQIMMLVLSFVLGHVLRRHRVYFLPEASASLLIGLIVGGLANISNTETNISGEVSCGRFAKRNELAKFPHRFWGSDFLTPVVGDLASSSTETTQFPERPETSADDRCSIGRSMGMEEEAQIMLISPAEPKGSPVKDQQAAGVGILLQIMMLVLSFVLGHVLRRHRVYFLPEASASLLIGLIVGGLANISNTETNISLSPKPFFSNFGAIVTFAILGTFIASVVTGGLVYLGGLMFLMYRLPFVECLMFGALISATDPVTVLSIFQELGTDVNLYALVFGESVLNDAMAISLYRTMSLVRSHAYSGKNFFFVIVRFLETFVGS…

## Sheet: Table S2
Table S2 Collinearity analysis among C. moschata, C. maxima, C. pepo and A. thaliana NHX gene families
Gene Name	Gene ID	Chr	Start (bp)	End (bp)	Collinear gene name	Collinear gene ID	Chr	Start (bp)	End (bp)
CmoNHX1	CmoCh01G011470.1	Cmo_Chr01	9406608	9416026	CmaNHX1	CmaCh01G011010.1	Cma_Chr01	8073976	8083094
CmoNHX2	CmoCh04G022490.1	Cmo_Chr04	16821621	16850447	CmaNHX2	CmaCh04G021540.1	Cma_Chr04	15081201	15127514
CmoNHX3	CmoCh08G011760.1	Cmo_Chr08	7482903	7488855	CmaNHX3	CmaCh08G012010.1	Cma_Chr08	7385483	7391030
CmoNHX3	CmoCh08G011760.1	Cmo_Chr08	7482903	7488855	CmaNHX8	CmaCh17G011310.1	Cma_Chr17	7885629	7891787
CmoNHX4	CmoCh10G011690.1	Cmo_Chr10	10438999	10445386	CmaNHX4	CmaCh10G010920.1	Cma_Chr10	7256436	7263128
CmoNHX5	CmoCh11G013070.1	Cmo_Chr11	8965531	8970782	CmaNHX5	CmaCh11G012510.1	Cma_Chr11	8327881	8333693
CmoNHX6	CmoCh13G003410.1	Cmo_Chr13	4368154	4375909	CmaNHX9	CmaCh18G006240.1	Cma_Chr18	5526159	5532338
CmoNHX6	CmoCh13G003410.1	Cmo_Chr13	4368154	4375909	CmaNHX6	CmaCh13G003230.1	Cma_Chr13	3735510	3743050
CmoNHX7	CmoCh13G003420.1	Cmo_Chr13	4375945	4381926	CmaNHX7	CmaCh13G003240.1	Cma_Chr13	3743086	3753602
CmoNHX8	CmoCh17G011050.1	Cmo_Chr17	9077906	9086008	CmaNHX8	CmaCh17G011310.1	Cma_Chr17	7885629	7891787
CmoNHX8	CmoCh17G011050.1	Cmo_Chr17	9077906	9086008	CmaNHX3	CmaCh08G012010.1	Cma_Chr08	7385483	7391030
CmoNHX9	CmoCh18G006110.1	Cmo_Chr18	7418948	7432545	CmaNHX9	CmaCh18G006240.1	Cma_Chr18	5526159	5532338
CmoNHX9	CmoCh18G006110.1	Cmo_Chr18	7418948	7432545	CmaNHX6	CmaCh13G003230.1	Cma_Chr13	3735510	3743050
CmoNHX1	CmoCh01G011470.1	Cmo_Chr01	9406608	9416026	CpNHX1	Cp4.1LG02g00760.1	Cp4.1LG02	5117043	5124508
CmoNHX3	CmoCh08G011760.1	Cmo_Chr08	7482903	7488855	CpNHX4	Cp4.1LG11g09280.1	Cp4.1LG11	7755738	7762736
CmoNHX3	CmoCh08G011760.1	Cmo_Chr08	7482903	7488855	CpNHX5	Cp4.1LG12g05410.1	Cp4.1LG12	8191682	8201059
CmoNHX3	CmoCh08G011760.1	Cmo_Chr08	7482903	7488855	CpNHX6	Cp4.1LG17g00770.1	Cp4.1LG17	13054	16580
CmoNHX3	CmoCh08G011760.1	Cmo_Chr08	7482903	7488855	CpNHX7	Cp4.1LG17g00950.1	Cp4.1LG17	590904	596069
CmoNHX4	CmoCh10G011690.1	Cmo_Chr10	10438999	10445386	CpNHX4	Cp4.1LG11g09280.1	Cp4.1LG11	7755738	7762736
CmoNHX5	CmoCh11G013070.1	Cmo_Chr11	8965531	8970782	CpNHX2	Cp4.1LG04g08510.1	Cp4.1LG04	2910144	2916587
CmoNHX6	CmoCh13G003410.1	Cmo_Chr13	4368154	4375909	CpNHX8	Cp4.1LG20g06710.1	Cp4.1LG20	4583218	4611386
CmoNHX6	CmoCh13G003410.1	Cmo_Chr13	4368154	4375909	CpNHX3	Cp4.1LG10g12560.1	Cp4.1LG10	9526308	9538085
CmoNHX8	CmoCh17G011050.1	Cmo_Chr17	9077906	9086008	CpNHX5	Cp4.1LG12g05410.1	Cp4.1LG12	8191682	8201059
CmoNHX8	CmoCh17G011050.1	Cmo_Chr17	9077906	9086008	CpNHX6	Cp4.1LG17g00770.1	Cp4.1LG17	13054	16580
CmoNHX1	CmoCh01G011470.1	Cmo_Chr01	9406608	9416026	AtNHX3	AT5G55470.1	AtChr5	22469245	22472706
CmoNHX2	CmoCh04G022490.1	Cmo_Chr04	16821621	16850447	AtNHX8	AT1G14660.1	AtChr1	5031950	5036477
CmoNHX2	CmoCh04G022490.1	Cmo_Chr04	16821621	16850447	AtNHX7	AT2G01980.1	AtChr2	457010	463326
CmoNHX3	CmoCh08G011760.1	Cmo_Chr08	7482903	7488855	AtNHX4	AT3G06370.1	AtChr3	1930396	1934073
CmoNHX4	CmoCh10G011690.1	Cmo_Chr10	10438999	10445386	AtNHX2	AT3G05030.1	AtChr3	1393296	1397358
CmaNHX1	CmaCh01G011010.1	Cma_Chr01	8073976	8083094	CpNHX1	Cp4.1LG02g00760.1	Cp4.1LG02	5117043	5124508
CmaNHX3	CmaCh08G012010.1	Cma_Chr08	7385483	7391030	CpNHX4	Cp4.1LG11g09280.1	Cp4.1LG11	7755738	7762736
CmaNHX4	CmaCh10G010920.1	Cma_Chr10	7256436	7263128	CpNHX4	Cp4.1LG11g09280.1	Cp4.1LG11	7755738	7762736
CmaNHX5	CmaCh11G012510.1	Cma_Chr11	8327881	8333693	CpNHX2	Cp4.1LG04g08510.1	Cp4.1LG04	2910144	2916587
CmaNHX6	CmaCh13G003230.1	Cma_Chr13	3735510	3743050	CpNHX3	Cp4.1LG10g12560.1	Cp4.1LG10	9526308	9538085
CmaNHX6	CmaCh13G003230.1	Cma_Chr13	3735510	3743050	CpNHX8	Cp4.1LG20g06710.1	Cp4.1LG20	4583218	4611386
CmaNHX8	CmaCh17G011310.1	Cma_Chr17	7885629	7891787	CpNHX5	Cp4.1LG12g05410.1	Cp4.1LG12	8191682	8201059
CmaNHX8	CmaCh17G011310.1	Cma_Chr17	7885629	7891787	CpNHX6	Cp4.1LG17g00770.1	Cp4.1LG17	13054	16580
CmaNHX9	CmaCh18G006240.1	Cma_Chr18	5526159	5532338	CpNHX3	Cp4.1LG10g12560.1	Cp4.1LG10	9526308	9538085
CmaNHX9	CmaCh18G006240.1	Cma_Chr18	5526159	5532338	CpNHX8	Cp4.1LG20g06710.1	Cp4.1LG20	4583218	4611386
CmaNHX1	CmaCh01G011010.1	Cma_Chr01	8073976	8083094	AtNHX3	AT5G55470.1	AtChr5	22469245	22472706
CmaNHX2	CmaCh04G021540.1	Cma_Chr04	15081201	15127514	AtNHX7	AT2G01980.1	AtChr2	457010	463326
CmaNHX3	CmaCh08G012010.1	Cma_Chr08	7385483	7391030	AtNHX4	AT3G06370.1	AtChr3	1930396	1934073
CmaNHX4	CmaCh10G010920.1	Cma_Chr10	7256436	7263128	AtNHX2	AT3G05030.1	AtChr3	1393296	1397358
CpNHX1	Cp4.1LG02g00760.1	Cp4.1LG02	5117043	5124508	AtNHX3	AT5G55470.1	AtChr5	22469245	22472706
CpNHX7	Cp4.1LG17g00950.1	Cp4.1LG17	590904	596069	AtNHX4	AT3G06370.1	AtChr3	1930396	1934073

## Sheet: Table S3
Table S3 Detailed information about cis-acting elements of 26 NHX gene promoters in Cucurbita genus.
Gene ID	Name	Sequence	Description
CmoCh01G011470.1	G-box	TGACACGTGGCTCT	Light responsiveness
CmoCh01G011470.1	G-box	CACGTG	Light responsiveness
CmoCh01G011470.1	G-box	CACGAC	Light responsiveness
CmoCh01G011470.1	G-box	CACGTC	Light responsiveness
CmoCh01G011470.1	G-box	CACGTC	Light responsiveness
CmoCh01G011470.1	G-box	CACGTC	Light responsiveness
CmoCh01G011470.1	G-box	TACGTG	Light responsiveness
CmoCh01G011470.1	G-box	ACACGTGT	Light responsiveness
CmoCh01G011470.1	G-box	CACGTG	Light responsiveness
CmoCh01G011470.1	G-box	tgACACGTGGCA	Light responsiveness
CmoCh01G011470.1	G-box	GCCACGTGGA	Light responsiveness
CmoCh01G011470.1	G-box	CACGTG	Light responsiveness
CmoCh01G011470.1	AuxRR-core	GGTCCAT	Auxin responsiveness
CmoCh01G011470.1	ABRE	CGCACGTGTC	Abscisic acid responsiveness
CmoCh01G011470.1	ABRE	CACGTG	Abscisic acid responsiveness
CmoCh01G011470.1	ABRE	ACGTG	Abscisic acid responsiveness
CmoCh01G011470.1	ABRE	ACGTG	Abscisic acid responsiveness
CmoCh01G011470.1	ABRE	ACGTG	Abscisic acid responsiveness
CmoCh01G011470.1	ABRE	ACGTG	Abscisic acid responsiveness
CmoCh01G011470.1	ABRE	ACGTG	Abscisic acid responsiveness
CmoCh01G011470.1	ABRE	CACGTG	Abscisic acid responsiveness
CmoCh01G011470.1	ABRE	ACGTG	Abscisic acid responsiveness
CmoCh01G011470.1	ABRE	GACACGTGGC	Abscisic acid responsiveness
CmoCh01G011470.1	ABRE	CACGTG	Abscisic acid responsiveness
CmoCh01G011470.1	ABRE	ACGTG	Abscisic acid responsiveness
CmoCh01G011470.1	ABRE	ACGTG	Abscisic acid responsiveness
CmoCh01G011470.1	GT1-motif	GGTTAAT	Light responsiveness
CmoCh01G011470.1	TGACG-motif	TGACG	MeJA-responsiveness
CmoCh01G011470.1	TGACG-motif	TGACG	MeJA-responsiveness
CmoCh01G011470.1	TGACG-motif	TGACG	MeJA-responsiveness
CmoCh01G011470.1	TGACG-motif	TGACG	MeJA-responsiveness
CmoCh01G011470.1	TGACG-motif	TGACG	MeJA-responsiveness
CmoCh01G011470.1	TGACG-motif	TGACG	MeJA-responsiveness
CmoCh01G011470.1	TGACG-motif	TGACG	MeJA-responsiveness
CmoCh01G011470.1	MRE	AACCTAA	Light responsiveness
CmoCh01G011470.1	GARE-motif	TCTGTTG	Gibberellin responsiveness
CmoCh01G011470.1	G-Box	CACGTG	Light responsiveness
CmoCh01G011470.1	G-Box	CACGTG	Light responsiveness
CmoCh01G011470.1	G-Box	CACGTG	Light responsiveness
CmoCh01G011470.1	G-Box	CACGTT	Light responsiveness
CmoCh01G011470.1	Box 4	ATTAAT	Light responsiveness
CmoCh01G011470.1	Box 4	ATTAAT	Light responsiveness
CmoCh01G011470.1	Box 4	ATTAAT	Light responsiveness
CmoCh01G011470.1	Box 4	ATTAAT	Light responsiveness
CmoCh01G011470.1	Box 4	ATTAAT	Light responsiveness
CmoCh01G011470.1	Box 4	ATTAAT	Light responsiveness
CmoCh01G011470.1	Box 4	ATTAAT	Light responsiveness
CmoCh01G011470.1	MBS	CAACTG	Drought-inducibility
CmoCh01G011470.1	MBS	CAACTG	Drought-inducibility
CmoCh01G011470.1	CGTCA-motif	CGTCA	MeJA-responsiveness
CmoCh01G011470.1	CGTCA-motif	CGTCA	MeJA-responsiveness
CmoCh01G011470.1	CGTCA-motif	CGTCA	MeJA-responsiveness
CmoCh01G011470.1	CGTCA-motif	CGTCA	MeJA-responsiveness
CmoCh01G011470.1	CGTCA-motif	CGTCA	MeJA-responsiveness
CmoCh01G011470.1	CGTCA-motif	CGTCA	MeJA-responsiveness
CmoCh01G011470.1	CGTCA-motif	CGTCA	MeJA-responsiveness
CmoCh01G011470.1	ARE	AAACCA	Anaerobic induction
CmoCh04G022490.1	ABRE	ACGTG	Abscisic acid responsiveness
CmoCh04G022490.1	ABRE	ACGTG	Abscisic acid responsiveness
CmoCh04G022490.1	TCA-element	TCAGAAGAGG	Salicylic acid responsiveness
CmoCh04G022490.1	LAMP-element	CTTTATCA	Light responsiveness
CmoCh04G022490.1	TC-rich repeats	GTTTTCTTAC	Defense and stress responsiveness
CmoCh04G022490.1	AT1-motif	AATTATTTTTTATT	Light responsiveness
CmoCh04G022490.1	GA-motif	ATAGATAA	Light responsiveness
CmoCh04G022490.1	TCT-motif	TCTTAC	Light responsiveness
CmoCh04G022490.1	GATA-motif	AAGATAAGATT	Light responsiveness
CmoCh04G022490.1	GATA-motif	AAGATAAGATT	Light responsiveness
CmoCh04G022490.1	GT1-motif	GGTTAA	Light responsiveness
CmoCh04G022490.1	MRE	AACCTAA	Light responsiveness
CmoCh04G022490.1	MRE	AACCTAA	Light responsiveness
CmoCh04G022490.1	MRE	AACCTAA	Light responsiveness
CmoCh04G022490.1	G-Box	CACGTT	Light responsiveness
CmoCh04G022490.1	G-Box	CACGTT	Light responsiveness
CmoCh04G022490.1	Box 4	ATTAAT	Light responsiveness
CmoCh04G022490.1	Box 4	ATTAAT	Light responsiveness
CmoCh04G022490.1	Box 4	ATTAAT	Light responsiveness
CmoCh04G022490.1	Box 4	ATTAAT	Light responsiveness
CmoCh04G022490.1	Box 4	ATTAAT	Light responsiveness
CmoCh04G022490.1	ARE	AAACCA	Anaerobic induction
CmoCh04G022490.1	TGA-element	AACGAC	Auxin responsiveness
CmoCh04G022490.1	TGA-element	AACGAC	Auxin responsiveness
CmoCh08G011760.1	MRE	AACCTAA	Light responsiveness
CmoCh08G011760.1	TGACG-motif	TGACG	MeJA-responsiveness
CmoCh08G011760.1	GT1-motif	GGTTAA	Light responsiveness
CmoCh08G011760.1	GATA-motif	AAGATAAGATT	Light responsiveness
CmoCh08G011760.1	TCT-motif	TCTTAC	Light responsiveness
CmoCh08G011760.1	TCT-motif	TCTTAC	Light responsiveness
CmoCh08G011760.1	chs-CMA1a	TTACTTAA	Light responsiveness
CmoCh08G011760.1	ABRE	ACGTG	Abscisic acid responsiveness
CmoCh08G011760.1	ABRE	ACGTG	Abscisic acid responsiveness
CmoCh08G011760.1	ABRE	GCAACGTGTC	Abscisic acid responsiveness
CmoCh08G011760.1	ABRE	ACGTG	Abscisic acid responsiveness
CmoCh08G011760.1	ABRE	CACGTG	Abscisic acid responsiveness
CmoCh08G011760.1	ABRE	ACGTG	Abscisic acid responsiveness
CmoCh08G011760.1	ABRE	ACGTG	Abscisic acid responsiveness
CmoCh08G011760.1	G-box	TACGTG	Light responsiveness
CmoCh08G011760.1	G-box	CACGTG	Light responsiveness
CmoCh08G011760.1	LTR	CCGAAA	Low-temperature responsiveness
CmoCh08G011760.1	LTR	CCGAAA	Low-temperature responsiveness
CmoCh08G011760.1	TC-rich repeats	ATTCTCTAAC	Defense and stress responsiveness
CmoCh08G011760.1	3-AF1 binding site	TAAGAGAGGAA	Light responsiveness
CmoCh08G011760.1	CGTCA-motif	CGTCA	MeJA-responsiveness
CmoCh08G011760.1	ARE	AAACCA	Anaerobic induction
CmoCh08G011760.1	MBS	CAACTG	Drought-inducibility
CmoCh08G011760.1	Box 4	ATTAAT	Light responsiveness
CmoCh08G011760.1	G-Box	CACGTT	Light responsiveness
CmoCh08G011760.1	G-Box	CACGTT	Light responsiveness
CmoCh08G011760.1	G-Box	CACGTG	Light responsiveness
CmoCh08G011760.1	G-Box	CACGTT	Light responsiveness
CmoCh08G011760.1	AE-box	AGAAACAA	Light responsiveness
CmoCh08G011760.1	AE-box	AGAAACTT	Light responsiveness
CmoCh10G011690.1	GATA-motif	GATAGGA	Light responsiveness
CmoCh10G011690.1	MRE	AACCTAA	Light responsiveness
CmoCh10G011690.1	MRE	AACCTAA	Light responsiveness
CmoCh10G011690.1	MRE	AACCTAA	Light responsiveness
CmoCh10G011690.1	MRE	AACCTAA	Light responsiveness
CmoCh10G011690.1	MRE	AACCTAA	Light responsiveness
CmoCh10G011690.1	TGACG-motif	TGACG	MeJA-responsiveness
CmoCh10G011690.1	TGACG-motif	TGACG	MeJA-responsiveness
CmoCh10G011690.1	ABRE	ACGTG	Abscisic acid responsiveness
CmoCh10G011690.1	TCA-element	CCATCTTTTT	Salicylic acid responsiveness
CmoCh10G011690.1	G-box	TACGTG	Light responsiveness
CmoCh10G011690.1	ARE	AAACCA	Anaerobic induction
CmoCh10G011690.1	ARE	AAACCA	Anaerobic induction
CmoCh10G011690.1	ARE	AAACCA	Anaerobic induction
CmoCh10G011690.1	CGTCA-motif	CGTCA	MeJA-responsiveness
CmoCh10G011690.1	CGTCA-motif	CGTCA	MeJA-responsiveness
CmoCh10G011690.1	Box 4	ATTAAT	Light responsiveness
CmoCh10G011690.1	Box 4	ATTAAT	Light responsiveness
CmoCh10G011690.1	Box 4	ATTAAT	Light responsiveness
CmoCh10G011690.1	ATCT-motif	AATCTAATCC	Light responsiveness
CmoCh11G013070.1	G-Box	CACGTG	Light responsiveness
CmoCh11G013070.1	G-Box	CACGTT	Light responsiveness
CmoCh11G013070.1	G-Box	TCCACATGGCA	Light responsiveness
CmoCh11G013070.1	G-Box	CACGTG	Light responsiveness
CmoCh11G013070.1	Box 4	ATTAAT	Light responsiveness
CmoCh11G013070.1	ATCT-motif	AATCTAATCC	Light responsiveness
CmoCh11G013070.1	AAAC-motif	CAATCAAAACCT	Light responsiveness
CmoCh11G013070.1	Box II	CCACGTGGC	Light responsiveness
CmoCh11G013070.1	ARE	AAACCA	Anaerobic induction
CmoCh11G013070.1	ARE	AAACCA	Anaerobic induction
CmoCh11G013070.1	CGTCA-motif	CGTCA	MeJA-responsiveness
CmoCh11G013070.1	CGTCA-motif	CGTCA	MeJA-responsiveness
CmoCh11G013070.1	ABRE	CACGTG	Abscisic acid responsiveness
CmoCh11G013070.1	ABRE	ACGTG	Abscisic acid responsiveness
CmoCh11G013070.1	ABRE	ACGTG	Abscisic acid responsiveness
CmoCh11G013070.1	ABRE	CACGTG	Abscisic acid responsiveness
CmoCh11G013070.1	ABRE	ACGTG	Abscisic acid responsiveness
CmoCh11G013070.1	ABRE	ACGTG	Abscisic acid responsiveness
CmoCh11G013070.1	TCA-element	CCATCTTTTT	Salicylic acid responsiveness
CmoCh11G013070.1	TC-rich repeats	GTTTTCTTAC	Defense and stress responsiveness
CmoCh11G013070.1	LTR	CCGAAA	Low-temperature responsiveness
CmoCh11G013070.1	G-box	CACGTG	Light responsiveness
CmoCh11G013070.1	G-box	TAAACGTG	Light responsiveness
CmoCh11G013070.1	G-box	GCCACGTGGA	Light responsiveness
CmoCh11G013070.1	G-box	CACGTG	Light responsiveness
CmoCh11G013070.1	G-box	CACGAC	Light responsiveness
CmoCh11G013070.1	G-box	CACGTC	Light responsiveness
CmoCh11G013070.1	G-box	CACGAC	Light responsiveness
CmoCh11G013070.1	TCT-motif	TCTTAC	Light responsiveness
CmoCh11G013070.1	TCT-motif	TCTTAC	Light responsiveness
CmoCh11G013070.1	TGACG-motif	TGACG	MeJA-responsiveness
CmoCh11G013070.1	TGACG-motif	TGACG	MeJA-responsiveness
CmoCh13G003410.1	ACE	CTAACGTATT	Light responsiveness
CmoCh13G003410.1	G-box	CACGTC	Light responsiveness
CmoCh13G003410.1	ABRE	ACGTG	Abscisic acid responsiveness
CmoCh13G003410.1	GATA-motif	AAGATAAGATT	Light responsiveness
CmoCh13G003410.1	Box 4	ATTAAT	Light responsiveness
CmoCh13G003410.1	Box 4	ATTAAT	Light responsiveness
CmoCh13G003410.1	ATC-motif	AGTAATCT	Light responsiveness
CmoCh13G003410.1	ARE	AAACCA	Anaerobic induction
CmoCh13G003410.1	ARE	AAACCA	Anaerobic induction
CmoCh13G003410.1	MBS	CAACTG	Drought-inducibility
CmoCh13G003410.1	MBS	CAACTG	Drought-inducibility
CmoCh13G003410.1	MBS	CAACTG	Drought-inducibility
CmoCh13G003410.1	MBS	CAACTG	Drought-inducibility
CmoCh13G003420.1	Sp1	GGGCGG	Light responsiveness
CmoCh13G003420.1	TCCC-motif	TCTCCCT	Light responsiveness
CmoCh13G003420.1	TCT-motif	TCTTAC	Light responsiveness
CmoCh13G003420.1	GATA-motif	GATAGGG	Light responsiveness
CmoCh13G003420.1	MRE	AACCTAA	Light responsiveness
CmoCh13G003420.1	TGACG-motif	TGACG	MeJA-responsiveness
CmoCh13G003420.1	TGACG-motif	TGACG	MeJA-responsiveness
CmoCh13G003420.1	ABRE	CACGTG	Abscisic acid responsiveness
CmoCh13G003420.1	ABRE	ACGTG	Abscisic acid responsiveness
CmoCh13G003420.1	ABRE	ACGTG	Abscisic acid responsiveness
CmoCh13G003420.1	TCA-element	CCATCTTTTT	Salicylic acid responsiveness
CmoCh13G003420.1	G-box	CACGAC	Light responsiveness
CmoCh13G003420.1	G-box	CACGTG	Light responsiveness
CmoCh13G003420.1	G-box	CACGTC	Light responsiveness
CmoCh13G003420.1	LTR	CCGAAA	Low-temperature responsiveness
CmoCh13G003420.1	LTR	CCGAAA	Low-temperature responsiveness
CmoCh13G003420.1	LTR	CCGAAA	Low-temperature responsiveness
CmoCh13G003420.1	ARE	AAACCA	Anaerobic induction
CmoCh13G003420.1	CGTCA-motif	CGTCA	MeJA-responsiveness
CmoCh13G003420.1	CGTCA-motif	CGTCA	MeJA-responsiveness
CmoCh13G003420.1	TGA-element	AACGAC	Auxin responsiveness
CmoCh13G003420.1	G-Box	CACGTG	Light responsiveness
CmoCh13G003420.1	GTGGC-motif	GATTCTGTGGC	Light responsiveness
CmoCh13G003420.1	GARE-motif	TCTGTTG	Gibberellin responsiveness
CmoCh17G011050.1	Box 4	ATTAAT	Light responsiveness
CmoCh17G011050.1	Box 4	ATTAAT	Light responsiveness
CmoCh17G011050.1	Box 4	ATTAAT	Light responsiveness
CmoCh17G011050.1	Box 4	ATTAAT	Light responsiveness
CmoCh17G011050.1	G-Box	CACGTT	Light responsiveness
CmoCh17G011050.1	CGTCA-motif	CGTCA	MeJA-responsiveness
CmoCh17G011050.1	CGTCA-motif	CGTCA	MeJA-responsiveness
CmoCh17G011050.1	ARE	AAACCA	Anaerobic induction
CmoCh17G011050.1	ARE	AAACCA	Anaerobic induction
CmoCh17G011050.1	LTR	CCGAAA	Low-temperature responsiveness
CmoCh17G011050.1	G-box	CACGTC	Light responsiveness
CmoCh17G011050.1	ABRE	ACGTG	Abscisic acid responsiveness
CmoCh17G011050.1	ABRE	ACGTG	Abscisic acid responsiveness
CmoCh17G011050.1	TCA-element	TCAGAAGAGG	Salicylic acid responsiveness
CmoCh17G011050.1	TCA-element	CCATCTTTTT	Salicylic acid responsiveness
CmoCh17G011050.1	TGACG-motif	TGACG	MeJA-responsiveness
CmoCh17G011050.1	TGACG-motif	TGACG	MeJA-responsiveness
CmoCh17G011050.1	GATA-motif	AAGATAAGATT	Light responsiveness
CmoCh17G011050.1	GATA-motif	AAGATAAGATT	Light responsiveness
CmoCh17G011050.1	GT1-motif	GGTTAAT	Light responsiveness
CmoCh17G011050.1	GT1-motif	GGTTAA	Light responsiveness
CmoCh17G011050.1	GT1-motif	GTGTGTGAA	Light responsiveness
CmoCh17G011050.1	TCT-motif	TCTTAC	Light responsiveness
CmoCh17G011050.1	chs-CMA1a	TTACTTAA	Light responsiveness
CmoCh18G006110.1	TGA-box	TGACGTAA	Auxin responsiveness
CmoCh18G006110.1	CGTCA-motif	CGTCA	MeJA-responsiveness
CmoCh18G006110.1	ARE	AAACCA	Anaerobic induction
CmoCh18G006110.1	ARE	AAACCA	Anaerobic induction
CmoCh18G006110.1	ARE	AAACCA	Anaerobic induction
CmoCh18G006110.1	ARE	AAACCA	Anaerobic induction
CmoCh18G006110.1	ARE	AAACCA	Anaerobic induction
CmoCh18G006110.1	TGA-element	AACGAC	Auxin responsiveness
CmoCh18G006110.1	I-box	gGATAAGGTG	Light responsiveness
CmoCh18G006110.1	Box 4	ATTAAT	Light responsiveness
CmoCh18G006110.1	Box 4	ATTAAT	Light responsiveness
CmoCh18G006110.1	Box 4	ATTAAT	Light responsiveness
CmoCh18G006110.1	Box 4	ATTAAT	Light responsiveness
CmoCh18G006110.1	Box 4	ATTAAT	Light responsiveness
CmoCh18G006110.1	AE-box	AGAAACTT	Light responsiveness
CmoCh18G006110.1	TCCC-motif	TCTCCCT	Light responsiveness
CmoCh18G006110.1	GA-motif	ATAGATAA	Light responsiveness
CmoCh18G006110.1	GATA-motif	GATAGGA	Light responsiveness
CmoCh18G006110.1	TGACG-motif	TGACG	MeJA-responsiveness
CmoCh18G006110.1	MRE	AACCTAA	Light responsiveness
CmoCh18G006110.1	ABRE	AACCCGG	Abscisic acid responsiveness
CmoCh18G006110.1	ABRE	ACGTG	Abscisic acid responsiveness
CmoCh18G006110.1	TC-rich repeats	ATTCTCTAAC	Defense and stress responsiveness
CmoCh18G006110.1	TC-rich repeats	ATTCTCTAAC	Defense and stress responsiveness
CmoCh18G006110.1	G-box	CACGAC	Light responsiveness
CmoCh18G006110.1	G-box	TAACACGTAG	Light responsiveness
CmoCh18G006110.1	G-box	CACGTC	Light responsiveness
CmoCh18G006110.1	G-box	CACGAC	Light responsiveness
CmoCh18G006110.1	ACE	CTAACGTATT	Light responsiveness
CmaCh01G011010.1	TATC-box	TATCCCA	Gibberellin responsiveness
CmaCh01G011010.1	G-Box	CACGTG	Light responsiveness
CmaCh01G011010.1	G-Box	CACGTG	Light responsiveness
CmaCh01G011010.1	G-Box	CACGTG	Light responsiveness
CmaCh01G011010.1	G-Box	CACGTT	Light responsiveness
CmaCh01G011010.1	ATCT-motif	AATCTAATCC	Light responsiveness
CmaCh01G011010.1	TCT-motif	TCTTAC	Light responsiveness
CmaCh01G011010.1	chs-CMA1a	TTACTTAA	Light responsiveness
CmaCh01G011010.1	ACE	CTAACGTATT	Light responsiveness
CmaCh01G011010.1	ACE	GACACGTATG	Light responsiveness
CmaCh01G011010.1	TGA-element	AACGAC	Auxin responsiveness
CmaCh01G011010.1	AT1-motif	AATTATTTTTTATT	Light responsiveness
CmaCh01G011010.1	P-box	CCTTTTG	Gibberellin responsiveness
CmaCh01G011010.1	TCCC-motif	TCTCCCT	Light responsiveness
CmaCh01G011010.1	GT1-motif	GGTTAA	Light responsiveness
CmaCh01G011010.1	GT1-motif	GGTTAAT	Light responsiveness
CmaCh01G011010.1	GT1-motif	GGTTAA	Light responsiveness
CmaCh01G011010.1	AE-box	AGAAACTT	Light responsiveness
CmaCh01G011010.1	CGTCA-motif	CGTCA	MeJA-responsiveness
CmaCh01G011010.1	CGTCA-motif	CGTCA	MeJA-responsiveness
CmaCh01G011010.1	CGTCA-motif	CGTCA	MeJA-responsiveness
CmaCh01G011010.1	CGTCA-motif	CGTCA	MeJA-responsiveness
CmaCh01G011010.1	CGTCA-motif	CGTCA	MeJA-responsiveness
CmaCh01G011010.1	CGTCA-motif	CGTCA	MeJA-responsiveness
CmaCh01G011010.1	TGACG-motif	TGACG	MeJA-responsiveness
CmaCh01G011010.1	TGACG-motif	TGACG	MeJA-responsiveness
CmaCh01G011010.1	TGACG-motif	TGACG	MeJA-responsiveness
CmaCh01G011010.1	TGACG-motif	TGACG	MeJA-responsiveness
CmaCh01G011010.1	TGACG-motif	TGACG	MeJA-responsiveness
CmaCh01G011010.1	TGACG-motif	TGACG	MeJA-responsiveness
CmaCh01G011010.1	ARE	AAACCA	Anaerobic induction
CmaCh01G011010.1	ARE	AAACCA	Anaerobic induction
CmaCh01G011010.1	ABRE	CGCACGTGTC	Abscisic acid responsiveness
CmaCh01G011010.1	ABRE	CACGTG	Abscisic acid responsiveness
CmaCh01G011010.1	ABRE	ACGTG	Abscisic acid responsiveness
CmaCh01G011010.1	ABRE	ACGTG	Abscisic acid responsiveness
CmaCh01G011010.1	ABRE	ACGTG	Abscisic acid responsiveness
CmaCh01G011010.1	ABRE	CGCACGTGTC	Abscisic acid responsiveness
CmaCh01G011010.1	ABRE	CACGTG	Abscisic acid responsiveness
CmaCh01G011010.1	ABRE	ACGTG	Abscisic acid responsiveness
CmaCh01G011010.1	ABRE	CGCACGTGTC	Abscisic acid responsiveness
CmaCh01G011010.1	ABRE	CACGTG	Abscisic acid responsiveness
CmaCh01G011010.1	ABRE	ACGTG	Abscisic acid responsiveness
CmaCh01G011010.1	ABRE	ACGTG	Abscisic acid responsiveness
CmaCh01G011010.1	Box 4	ATTAAT	Light responsiveness
CmaCh01G011010.1	Box 4	ATTAAT	Light responsiveness
CmaCh01G011010.1	Box 4	ATTAAT	Light responsiveness
CmaCh01G011010.1	Box 4	ATTAAT	Light responsiveness
CmaCh01G011010.1	Box 4	ATTAAT	Light responsiveness
CmaCh01G011010.1	G-box	CACGTG	Light responsiveness
CmaCh01G011010.1	G-box	CACGTC	Light responsiveness
CmaCh01G011010.1	G-box	CACGTC	Light responsiveness
CmaCh01G011010.1	G-box	ACACGTGT	Light responsiveness
CmaCh01G011010.1	G-box	CACGTG	Light responsiveness
CmaCh01G011010.1	G-box	tgACACGTGGCA	Light responsiveness
CmaCh01G011010.1	G-box	CACGTG	Light responsiveness
CmaCh04G021540.1	G-Box	CACGTT	Light responsiveness
CmaCh04G021540.1	TCA-element	CCATCTTTTT	Salicylic acid responsiveness
CmaCh04G021540.1	TATC-box	TATCCCA	Gibberellin responsiveness
CmaCh04G021540.1	ATCT-motif	AATCTAATCC	Light responsiveness
CmaCh04G021540.1	TCT-motif	TCTTAC	Light responsiveness
CmaCh04G021540.1	ABRE	ACGTG	Abscisic acid responsiveness
CmaCh04G021540.1	TGA-element	AACGAC	Auxin responsiveness
CmaCh04G021540.1	GA-motif	ATAGATAA	Light responsiveness
CmaCh04G021540.1	Box 4	ATTAAT	Light responsiveness
CmaCh04G021540.1	Box 4	ATTAAT	Light responsiveness
CmaCh04G021540.1	Box 4	ATTAAT	Light responsiveness
CmaCh04G021540.1	Box 4	ATTAAT	Light responsiveness
CmaCh04G021540.1	GT1-motif	GGTTAA	Light responsiveness
CmaCh08G012010.1	Box 4	ATTAAT	Light responsiveness
CmaCh08G012010.1	MBS	CAACTG	Drought-inducibility
CmaCh08G012010.1	MBS	CAACTG	Drought-inducibility
CmaCh08G012010.1	ABRE	CACGTG	Abscisic acid responsiveness
CmaCh08G012010.1	ABRE	ACGTG	Abscisic acid responsiveness
CmaCh08G012010.1	ABRE	ACGTG	Abscisic acid responsiveness
CmaCh08G012010.1	TGA-element	AACGAC	Auxin responsiveness
CmaCh08G012010.1	Sp1	GGGCGG	Light responsiveness
CmaCh08G012010.1	GT1-motif	GGTTAA	Light responsiveness
CmaCh08G012010.1	GT1-motif	GGTTAA	Light responsiveness
CmaCh08G012010.1	G-box	CACGTG	Light responsiveness
CmaCh08G012010.1	TCCC-motif	TCTCCCT	Light responsiveness
CmaCh08G012010.1	TGACG-motif	TGACG	MeJA-responsiveness
CmaCh08G012010.1	ATCT-motif	AATCTAATCC	Light responsiveness
CmaCh08G012010.1	CGTCA-motif	CGTCA	MeJA-responsiveness
CmaCh08G012010.1	GC-motif	CCCCCG	Anaerobic induction
CmaCh08G012010.1	G-Box	CACGTG	Light responsiveness
CmaCh08G012010.1	G-Box	CACGTT	Light responsiveness
CmaCh08G012010.1	AE-box	AGAAACTT	Light responsiveness
CmaCh08G012010.1	LTR	CCGAAA	Low-temperature responsiveness
CmaCh08G012010.1	LTR	CCGAAA	Low-temperature responsiveness
CmaCh08G012010.1	LTR	CCGAAA	Low-temperature responsiveness
CmaCh08G012010.1	ARE	AAACCA	Anaerobic induction
CmaCh08G012010.1	ARE	AAACCA	Anaerobic induction
CmaCh08G012010.1	MRE	AACCTAA	Light responsiveness
CmaCh08G012010.1	MRE	AACCTAA	Light responsiveness
CmaCh08G012010.1	3-AF1 binding site	TAAGAGAGGAA	Light responsiveness
CmaCh10G010920.1	G-box	CACGTG	Light responsiveness
CmaCh10G010920.1	G-box	TACGTG	Light responsiveness
CmaCh10G010920.1	GATA-motif	GATAGGA	Light responsiveness
CmaCh10G010920.1	ABRE	ACGTG	Abscisic acid responsiveness
CmaCh10G010920.1	ABRE	CACGTG	Abscisic acid responsiveness
CmaCh10G010920.1	ABRE	ACGTG	Abscisic acid responsiveness
CmaCh10G010920.1	ABRE	ACGTG	Abscisic acid responsiveness
CmaCh10G010920.1	TGA-element	AACGAC	Auxin responsiveness
CmaCh10G010920.1	Box 4	ATTAAT	Light responsiveness
CmaCh10G010920.1	Box 4	ATTAAT	Light responsiveness
CmaCh10G010920.1	LTR	CCGAAA	Low-temperature responsiveness
CmaCh10G010920.1	ARE	AAACCA	Anaerobic induction
CmaCh10G010920.1	ARE	AAACCA	Anaerobic induction
CmaCh10G010920.1	ARE	AAACCA	Anaerobic induction
CmaCh10G010920.1	ARE	AAACCA	Anaerobic induction
CmaCh10G010920.1	MRE	AACCTAA	Light responsiveness
CmaCh10G010920.1	MRE	AACCTAA	Light responsiveness
CmaCh10G010920.1	CGTCA-motif	CGTCA	MeJA-responsiveness
CmaCh10G010920.1	G-Box	CACGTT	Light responsiveness
CmaCh10G010920.1	G-Box	CACGTG	Light responsiveness
CmaCh10G010920.1	GC-motif	CCCCCG	Anaerobic induction
CmaCh10G010920.1	TGACG-motif	TGACG	MeJA-responsiveness
CmaCh11G012510.1	Box 4	ATTAAT	Light responsiveness
CmaCh11G012510.1	Box 4	ATTAAT	Light responsiveness
CmaCh11G012510.1	MBS	CAACTG	Drought-inducibility
CmaCh11G012510.1	MBS	CAACTG	Drought-inducibility
CmaCh11G012510.1	ABRE	CACGTG	Abscisic acid responsiveness
CmaCh11G012510.1	ABRE	ACGTG	Abscisic acid responsiveness
CmaCh11G012510.1	ABRE	CACGTG	Abscisic acid responsiveness
CmaCh11G012510.1	ABRE	ACGTG	Abscisic acid responsiveness
CmaCh11G012510.1	ABRE	CACGTG	Abscisic acid responsiveness
CmaCh11G012510.1	ABRE	ACGTG	Abscisic acid responsiveness
CmaCh11G012510.1	ABRE	ACGTG	Abscisic acid responsiveness
CmaCh11G012510.1	Box II	CCACGTGGC	Light responsiveness
CmaCh11G012510.1	GT1-motif	GGTTAA	Light responsiveness
CmaCh11G012510.1	TC-rich repeats	GTTTTCTTAC	Defense and stress responsiveness
CmaCh11G012510.1	G-box	CACGTG	Light responsiveness
CmaCh11G012510.1	G-box	ACACGTGT	Light responsiveness
CmaCh11G012510.1	G-box	CACGTG	Light responsiveness
CmaCh11G012510.1	G-box	GCCACGTGGA	Light responsiveness
CmaCh11G012510.1	G-box	CACGTG	Light responsiveness
CmaCh11G012510.1	G-box	CACGTC	Light responsiveness
CmaCh11G012510.1	G-box	CACGAC	Light responsiveness
CmaCh11G012510.1	TGACG-motif	TGACG	MeJA-responsiveness
CmaCh11G012510.1	CGTCA-motif	CGTCA	MeJA-responsiveness
CmaCh11G012510.1	G-Box	CACGTG	Light responsiveness
CmaCh11G012510.1	G-Box	CACGTG	Light responsiveness
CmaCh11G012510.1	G-Box	TCCACATGGCA	Light responsiveness
CmaCh11G012510.1	G-Box	CACGTG	Light responsiveness
CmaCh11G012510.1	ARE	AAACCA	Anaerobic induction
CmaCh11G012510.1	TCT-motif	TCTTAC	Light responsiveness
CmaCh11G012510.1	MRE	AACCTAA	Light responsiveness
CmaCh13G003230.1	GARE-motif	TCTGTTG	Gibberellin responsiveness
CmaCh13G003230.1	GARE-motif	TCTGTTG	Gibberellin responsiveness
CmaCh13G003230.1	MRE	AACCTAA	Light responsiveness
CmaCh13G003230.1	ARE	AAACCA	Anaerobic induction
CmaCh13G003230.1	ARE	AAACCA	Anaerobic induction
CmaCh13G003230.1	ARE	AAACCA	Anaerobic induction
CmaCh13G003230.1	LTR	CCGAAA	Low-temperature responsiveness
CmaCh13G003230.1	ACE	CTAACGTATT	Light responsiveness
CmaCh13G003230.1	TGA-element	AACGAC	Auxin responsiveness
CmaCh13G003230.1	ABRE	ACGTG	Abscisic acid responsiveness
CmaCh13G003230.1	ATC-motif	AGTAATCT	Light responsiveness
CmaCh13G003230.1	MBS	CAACTG	Drought-inducibility
CmaCh13G003230.1	MBS	CAACTG	Drought-inducibility
CmaCh13G003230.1	MBS	CAACTG	Drought-inducibility
CmaCh13G003230.1	Box 4	ATTAAT	Light responsiveness
CmaCh13G003230.1	Box 4	ATTAAT	Light responsiveness
CmaCh13G003230.1	Box 4	ATTAAT	Light responsiveness
CmaCh13G003230.1	Box 4	ATTAAT	Light responsiveness
CmaCh13G003230.1	Box 4	ATTAAT	Light responsiveness
CmaCh13G003230.1	TCCC-motif	TCTCCCT	Light responsiveness
CmaCh13G003230.1	P-box	CCTTTTG	Gibberellin responsiveness
CmaCh13G003230.1	G-box	CACGTC	Light responsiveness
CmaCh13G003230.1	GATA-motif	AAGATAAGATT	Light responsiveness
CmaCh13G003230.1	GATA-motif	AAGATAAGATT	Light responsiveness
CmaCh13G003240.1	G-box	CACGTC	Light responsiveness
CmaCh13G003240.1	G-box	TACGTG	Light responsiveness
CmaCh13G003240.1	TC-rich repeats	ATTCTCTAAC	Defense and stress responsiveness
CmaCh13G003240.1	GT1-motif	GGTTAAT	Light responsiveness
CmaCh13G003240.1	GT1-motif	GGTTAA	Light responsiveness
CmaCh13G003240.1	ABRE	ACGTG	Abscisic acid responsiveness
CmaCh13G003240.1	ABRE	ACGTG	Abscisic acid responsiveness
CmaCh13G003240.1	Box 4	ATTAAT	Light responsiveness
CmaCh13G003240.1	Box 4	ATTAAT	Light responsiveness
CmaCh13G003240.1	Box 4	ATTAAT	Light responsiveness
CmaCh13G003240.1	Box 4	ATTAAT	Light responsiveness
CmaCh13G003240.1	chs-CMA1a	TTACTTAA	Light responsiveness
CmaCh13G003240.1	LTR	CCGAAA	Low-temperature responsiveness
CmaCh13G003240.1	AE-box	AGAAACTT	Light responsiveness
CmaCh13G003240.1	CGTCA-motif	CGTCA	MeJA-responsiveness
CmaCh13G003240.1	CGTCA-motif	CGTCA	MeJA-responsiveness
CmaCh13G003240.1	TGACG-motif	TGACG	MeJA-responsiveness
CmaCh13G003240.1	TGACG-motif	TGACG	MeJA-responsiveness
CmaCh17G011310.1	TCT-motif	TCTTAC	Light responsiveness
CmaCh17G011310.1	chs-CMA1a	TTACTTAA	Light responsiveness
CmaCh17G011310.1	TGACG-motif	TGACG	MeJA-responsiveness
CmaCh17G011310.1	TGACG-motif	TGACG	MeJA-responsiveness
CmaCh17G011310.1	G-Box	CACGTT	Light responsiveness
CmaCh17G011310.1	TCA-element	CCATCTTTTT	Salicylic acid responsiveness
CmaCh17G011310.1	TCA-element	TCAGAAGAGG	Salicylic acid responsiveness
CmaCh17G011310.1	TCA-element	CCATCTTTTT	Salicylic acid responsiveness
CmaCh17G011310.1	AE-box	AGAAACTT	Light responsiveness
CmaCh17G011310.1	CGTCA-motif	CGTCA	MeJA-responsiveness
CmaCh17G011310.1	CGTCA-motif	CGTCA	MeJA-responsiveness
CmaCh17G011310.1	GT1-motif	GTGTGTGAA	Light responsiveness
CmaCh17G011310.1	GATA-motif	AAGATAAGATT	Light responsiveness
CmaCh17G011310.1	G-box	CCACGTAA	Light responsiveness
CmaCh17G011310.1	G-box	TACGTG	Light responsiveness
CmaCh17G011310.1	G-box	CACGTC	Light responsiveness
CmaCh17G011310.1	Box 4	ATTAAT	Light responsiveness
CmaCh17G011310.1	Box 4	ATTAAT	Light responsiveness
CmaCh17G011310.1	ABRE	ACGTG	Abscisic acid responsiveness
CmaCh17G011310.1	ABRE	ACGTG	Abscisic acid responsiveness
CmaCh17G011310.1	ABRE	ACGTG	Abscisic acid responsiveness
CmaCh17G011310.1	TGA-element	AACGAC	Auxin responsiveness
CmaCh18G006240.1	MBS	CAACTG	Drought-inducibility
CmaCh18G006240.1	MBS	CAACTG	Drought-inducibility
CmaCh18G006240.1	Box 4	ATTAAT	Light responsiveness
CmaCh18G006240.1	GA-motif	ATAGATAA	Light responsiveness
CmaCh18G006240.1	ABRE	GACACGTGGC	Abscisic acid responsiveness
CmaCh18G006240.1	ABRE	CACGTG	Abscisic acid responsiveness
CmaCh18G006240.1	ABRE	ACGTG	Abscisic acid responsiveness
CmaCh18G006240.1	GATA-motif	AAGATAAGATT	Light responsiveness
CmaCh18G006240.1	GT1-motif	GGTTAA	Light responsiveness
CmaCh18G006240.1	GT1-motif	GGTTAA	Light responsiveness
CmaCh18G006240.1	GT1-motif	GGTTAA	Light responsiveness
CmaCh18G006240.1	TC-rich repeats	GTTTTCTTAC	Defense and stress responsiveness
CmaCh18G006240.1	TC-rich repeats	ATTCTCTAAC	Defense and stress responsiveness
CmaCh18G006240.1	TC-rich repeats	GTTTTCTTAC	Defense and stress responsiveness
CmaCh18G006240.1	L-box	ATCCCACCTAC	Light responsiveness
CmaCh18G006240.1	Gap-box	CAAATGAA(A/G)A	Light responsiveness
CmaCh18G006240.1	G-box	CAGACGTGGCA	Light responsiveness
CmaCh18G006240.1	G-box	ACACGTGGC	Light responsiveness
CmaCh18G006240.1	G-box	CACGTG	Light responsiveness
CmaCh18G006240.1	G-box	CACGAC	Light responsiveness
CmaCh18G006240.1	P-box	CCTTTTG	Gibberellin responsiveness
CmaCh18G006240.1	TGACG-motif	TGACG	MeJA-responsiveness
CmaCh18G006240.1	TGACG-motif	TGACG	MeJA-responsiveness
CmaCh18G006240.1	TGACG-motif	TGACG	MeJA-responsiveness
CmaCh18G006240.1	CGTCA-motif	CGTCA	MeJA-responsiveness
CmaCh18G006240.1	CGTCA-motif	CGTCA	MeJA-responsiveness
CmaCh18G006240.1	CGTCA-motif	CGTCA	MeJA-responsiveness
CmaCh18G006240.1	G-Box	CACGTG	Light responsiveness
CmaCh18G006240.1	TCA-element	TCAGAAGAGG	Salicylic acid responsiveness
CmaCh18G006240.1	LTR	CCGAAA	Low-temperature responsiveness
CmaCh18G006240.1	ARE	AAACCA	Anaerobic induction
CmaCh18G006240.1	ARE	AAACCA	Anaerobic induction
CmaCh18G006240.1	ARE	AAACCA	Anaerobic induction
CmaCh18G006240.1	ARE	AAACCA	Anaerobic induction
CmaCh18G006240.1	ARE	AAACCA	Anaerobic induction
CmaCh18G006240.1	TCT-motif	TCTTAC	Light responsiveness
CmaCh18G006240.1	TCT-motif	TCTTAC	Light responsiveness
CmaCh18G006240.1	TCT-motif	TCTTAC	Light responsiveness
Cp4.1LG02g00760.1	G-Box	CACGTT	Light responsiveness
Cp4.1LG02g00760.1	G-Box	CACGTT	Light responsiveness
Cp4.1LG02g00760.1	G-Box	CACGTT	Light responsiveness
Cp4.1LG02g00760.1	G-Box	CACGTG	Light responsiveness
Cp4.1LG02g00760.1	G-Box	CACGTG	Light responsiveness
Cp4.1LG02g00760.1	G-Box	CACGTT	Light responsiveness
Cp4.1LG02g00760.1	ATCT-motif	AATCTAATCC	Light responsiveness
Cp4.1LG02g00760.1	AE-box	AGAAACTT	Light responsiveness
Cp4.1LG02g00760.1	GARE-motif	TCTGTTG	Gibberellin responsiveness
Cp4.1LG02g00760.1	GARE-motif	TCTGTTG	Gibberellin responsiveness
Cp4.1LG02g00760.1	DRE	TACCGACAT	Low-temperature responsiveness
Cp4.1LG02g00760.1	ARE	AAACCA	Anaerobic induction
Cp4.1LG02g00760.1	MRE	AACCTAA	Light responsiveness
Cp4.1LG02g00760.1	ACE	GACACGTATG	Light responsiveness
Cp4.1LG02g00760.1	TGA-element	AACGAC	Auxin responsiveness
Cp4.1LG02g00760.1	GT1-motif	GGTTAA	Light responsiveness
Cp4.1LG02g00760.1	Box 4	ATTAAT	Light responsiveness
Cp4.1LG02g00760.1	Box 4	ATTAAT	Light responsiveness
Cp4.1LG02g00760.1	Box 4	ATTAAT	Light responsiveness
Cp4.1LG02g00760.1	Box 4	ATTAAT	Light responsiveness
Cp4.1LG02g00760.1	Box 4	ATTAAT	Light responsiveness
Cp4.1LG02g00760.1	Box 4	ATTAAT	Light responsiveness
Cp4.1LG02g00760.1	Box 4	ATTAAT	Light responsiveness
Cp4.1LG02g00760.1	CGTCA-motif	CGTCA	MeJA-responsiveness
Cp4.1LG02g00760.1	CGTCA-motif	CGTCA	MeJA-responsiveness
Cp4.1LG02g00760.1	CGTCA-motif	CGTCA	MeJA-responsiveness
Cp4.1LG02g00760.1	CGTCA-motif	CGTCA	MeJA-responsiveness
Cp4.1LG02g00760.1	CGTCA-motif	CGTCA	MeJA-responsiveness
Cp4.1LG02g00760.1	CGTCA-motif	CGTCA	MeJA-responsiveness
Cp4.1LG02g00760.1	CGTCA-motif	CGTCA	MeJA-responsiveness
Cp4.1LG02g00760.1	G-box	TACGTG	Light responsiveness
Cp4.1LG02g00760.1	G-box	CACGAC	Light responsiveness
Cp4.1LG02g00760.1	G-box	CACGTC	Light responsiveness
Cp4.1LG02g00760.1	G-box	CACGTC	Light responsiveness
Cp4.1LG02g00760.1	G-box	CACGTC	Light responsiveness
Cp4.1LG02g00760.1	G-box	CCACGTAA	Light responsiveness
Cp4.1LG02g00760.1	G-box	TACGTG	Light responsiveness
Cp4.1LG02g00760.1	G-box	TAAACGTG	Light responsiveness
Cp4.1LG02g00760.1	G-box	ACACGTGT	Light responsiveness
Cp4.1LG02g00760.1	G-box	CACGTG	Light responsiveness
Cp4.1LG02g00760.1	G-box	tgACACGTGGCA	Light responsiveness
Cp4.1LG02g00760.1	G-box	CACGTG	Light responsiveness
Cp4.1LG02g00760.1	I-box	cCATATCCAAT	Light responsiveness
Cp4.1LG02g00760.1	ABRE	GACACGTACGT	Abscisic acid responsiveness
Cp4.1LG02g00760.1	ABRE	TACGTGTC	Abscisic acid responsiveness
Cp4.1LG02g00760.1	ABRE	ACGTG	Abscisic acid responsiveness
Cp4.1LG02g00760.1	ABRE	AACCCGG	Abscisic acid responsiveness
Cp4.1LG02g00760.1	ABRE	ACGTG	Abscisic acid responsiveness
Cp4.1LG02g00760.1	ABRE	ACGTG	Abscisic acid responsiveness
Cp4.1LG02g00760.1	ABRE	ACGTG	Abscisic acid responsiveness
Cp4.1LG02g00760.1	ABRE	ACGTG	Abscisic acid responsiveness
Cp4.1LG02g00760.1	ABRE	ACGTG	Abscisic acid responsiveness
Cp4.1LG02g00760.1	ABRE	ACGTG	Abscisic acid responsiveness
Cp4.1LG02g00760.1	ABRE	ACGTG	Abscisic acid responsiveness
Cp4.1LG02g00760.1	ABRE	CACGTG	Abscisic acid responsiveness
Cp4.1LG02g00760.1	ABRE	ACGTG	Abscisic acid responsiveness
Cp4.1LG02g00760.1	ABRE	CGCACGTGTC	Abscisic acid responsiveness
Cp4.1LG02g00760.1	ABRE	CACGTG	Abscisic acid responsiveness
Cp4.1LG02g00760.1	ABRE	ACGTG	Abscisic acid responsiveness
Cp4.1LG02g00760.1	ABRE	ACGTG	Abscisic acid responsiveness
Cp4.1LG02g00760.1	TGACG-motif	TGACG	MeJA-responsiveness
Cp4.1LG02g00760.1	TGACG-motif	TGACG	MeJA-responsiveness
Cp4.1LG02g00760.1	TGACG-motif	TGACG	MeJA-responsiveness
Cp4.1LG02g00760.1	TGACG-motif	TGACG	MeJA-responsiveness
Cp4.1LG02g00760.1	TGACG-motif	TGACG	MeJA-responsiveness
Cp4.1LG02g00760.1	TGACG-motif	TGACG	MeJA-responsiveness
Cp4.1LG02g00760.1	TGACG-motif	TGACG	MeJA-responsiveness
Cp4.1LG04g08510.1	sbp-CMA1c	CTTTATCTCTTCCA	Light responsiveness
Cp4.1LG04g08510.1	TGACG-motif	TGACG	MeJA-responsiveness
Cp4.1LG04g08510.1	TGACG-motif	TGACG	MeJA-responsiveness
Cp4.1LG04g08510.1	ABRE	CACGTG	Abscisic acid responsiveness
Cp4.1LG04g08510.1	ABRE	ACGTG	Abscisic acid responsiveness
Cp4.1LG04g08510.1	ABRE	ACGTG	Abscisic acid responsiveness
Cp4.1LG04g08510.1	ABRE	CACGTG	Abscisic acid responsiveness
Cp4.1LG04g08510.1	ABRE	ACGTG	Abscisic acid responsiveness
Cp4.1LG04g08510.1	ABRE	ACGTG	Abscisic acid responsiveness
Cp4.1LG04g08510.1	G-box	CACGTG	Light responsiveness
Cp4.1LG04g08510.1	G-box	TAAACGTG	Light responsiveness
Cp4.1LG04g08510.1	G-box	GCCACGTGGA	Light responsiveness
Cp4.1LG04g08510.1	G-box	CACGTG	Light responsiveness
Cp4.1LG04g08510.1	G-box	CACGAC	Light responsiveness
Cp4.1LG04g08510.1	G-box	CACGTC	Light responsiveness
Cp4.1LG04g08510.1	G-box	CACGAC	Light responsiveness
Cp4.1LG04g08510.1	MRE	AACCTAA	Light responsiveness
Cp4.1LG04g08510.1	CGTCA-motif	CGTCA	MeJA-responsiveness
Cp4.1LG04g08510.1	CGTCA-motif	CGTCA	MeJA-responsiveness
Cp4.1LG04g08510.1	TCT-motif	TCTTAC	Light responsiveness
Cp4.1LG04g08510.1	TCT-motif	TCTTAC	Light responsiveness
Cp4.1LG04g08510.1	ATC-motif	AGTAATCT	Light responsiveness
Cp4.1LG04g08510.1	ATCT-motif	AATCTAATCC	Light responsiveness
Cp4.1LG04g08510.1	Box 4	ATTAAT	Light responsiveness
Cp4.1LG04g08510.1	Box 4	ATTAAT	Light responsiveness
Cp4.1LG04g08510.1	Box 4	ATTAAT	Light responsiveness
Cp4.1LG04g08510.1	Box 4	ATTAAT	Light responsiveness
Cp4.1LG04g08510.1	Box 4	ATTAAT	Light responsiveness
Cp4.1LG04g08510.1	ARE	AAACCA	Anaerobic induction
Cp4.1LG04g08510.1	ARE	AAACCA	Anaerobic induction
Cp4.1LG04g08510.1	ARE	AAACCA	Anaerobic induction
Cp4.1LG04g08510.1	MBS	CAACTG	Drought-inducibility
Cp4.1LG04g08510.1	AAAC-motif	CAATCAAAACCT	Light responsiveness
Cp4.1LG04g08510.1	LAMP-element	CTTTATCA	Light responsiveness
Cp4.1LG04g08510.1	TC-rich repeats	GTTTTCTTAC	Defense and stress responsiveness
Cp4.1LG04g08510.1	TC-rich repeats	GTTTTCTTAC	Defense and stress responsiveness
Cp4.1LG04g08510.1	G-Box	CACGTG	Light responsiveness
Cp4.1LG04g08510.1	G-Box	CACGTT	Light responsiveness
Cp4.1LG04g08510.1	G-Box	TCCACATGGCA	Light responsiveness
Cp4.1LG04g08510.1	G-Box	CACGTG	Light responsiveness
Cp4.1LG04g08510.1	GARE-motif	TCTGTTG	Gibberellin responsiveness
Cp4.1LG04g08510.1	Box II	CCACGTGGC	Light responsiveness
Cp4.1LG10g12560.1	CGTCA-motif	CGTCA	MeJA-responsiveness
Cp4.1LG10g12560.1	MRE	AACCTAA	Light responsiveness
Cp4.1LG10g12560.1	GT1-motif	GGTTAAT	Light responsiveness
Cp4.1LG10g12560.1	GT1-motif	GGTTAAT	Light responsiveness
Cp4.1LG10g12560.1	AE-box	AGAAACAA	Light responsiveness
Cp4.1LG10g12560.1	G-box	CACGTC	Light responsiveness
Cp4.1LG10g12560.1	G-box	CACGTC	Light responsiveness
Cp4.1LG10g12560.1	ABRE	ACGTG	Abscisic acid responsiveness
Cp4.1LG10g12560.1	ABRE	ACGTG	Abscisic acid responsiveness
Cp4.1LG10g12560.1	ACE	GCGACGTACC	Light responsiveness
Cp4.1LG10g12560.1	TGACG-motif	TGACG	MeJA-responsiveness
Cp4.1LG10g12560.1	P-box	CCTTTTG	Gibberellin responsiveness
Cp4.1LG10g12560.1	chs-CMA1a	TTACTTAA	Light responsiveness
Cp4.1LG10g12560.1	Sp1	GGGCGG	Light responsiveness
Cp4.1LG10g12560.1	TCCC-motif	TCTCCCT	Light responsiveness
Cp4.1LG10g12560.1	MBS	CAACTG	Drought-inducibility
Cp4.1LG10g12560.1	MBS	CAACTG	Drought-inducibility
Cp4.1LG10g12560.1	ARE	AAACCA	Anaerobic induction
Cp4.1LG10g12560.1	ARE	AAACCA	Anaerobic induction
Cp4.1LG10g12560.1	Box 4	ATTAAT	Light responsiveness
Cp4.1LG10g12560.1	Box 4	ATTAAT	Light responsiveness
Cp4.1LG10g12560.1	Box 4	ATTAAT	Light responsiveness
Cp4.1LG10g12560.1	GATA-motif	AAGATAAGATT	Light responsiveness
Cp4.1LG10g12560.1	ACA-motif	AATCACAACCATA	Light responsiveness
Cp4.1LG11g09280.1	CGTCA-motif	CGTCA	MeJA-responsiveness
Cp4.1LG11g09280.1	TGACG-motif	TGACG	MeJA-responsiveness
Cp4.1LG11g09280.1	ACE	CTAACGTATT	Light responsiveness
Cp4.1LG11g09280.1	G-box	CACGAC	Light responsiveness
Cp4.1LG11g09280.1	G-box	TACGTG	Light responsiveness
Cp4.1LG11g09280.1	G-box	TACGTG	Light responsiveness
Cp4.1LG11g09280.1	G-box	TACGTG	Light responsiveness
Cp4.1LG11g09280.1	ABRE	ACGTG	Abscisic acid responsiveness
Cp4.1LG11g09280.1	ABRE	ACGTG	Abscisic acid responsiveness
Cp4.1LG11g09280.1	ABRE	ACGTG	Abscisic acid responsiveness
Cp4.1LG11g09280.1	AE-box	AGAAACTT	Light responsiveness
Cp4.1LG11g09280.1	AE-box	AGAAACTT	Light responsiveness
Cp4.1LG11g09280.1	AE-box	AGAAACTT	Light responsiveness
Cp4.1LG11g09280.1	GC-motif	CCCCCG	Anaerobic induction
Cp4.1LG11g09280.1	GC-motif	CCCCCG	Anaerobic induction
Cp4.1LG11g09280.1	TGA-element	AACGAC	Auxin responsiveness
Cp4.1LG11g09280.1	TCA-element	CCATCTTTTT	Salicylic acid responsiveness
Cp4.1LG11g09280.1	LTR	CCGAAA	Low-temperature responsiveness
Cp4.1LG11g09280.1	ARE	AAACCA	Anaerobic induction
Cp4.1LG11g09280.1	ARE	AAACCA	Anaerobic induction
Cp4.1LG12g05410.1	ABRE	ACGTG	Abscisic acid responsiveness
Cp4.1LG12g05410.1	ABRE	ACGTG	Abscisic acid responsiveness
Cp4.1LG12g05410.1	ABRE	ACGTG	Abscisic acid responsiveness
Cp4.1LG12g05410.1	ABRE	ACGTG	Abscisic acid responsiveness
Cp4.1LG12g05410.1	G-box	TAAACGTG	Light responsiveness
Cp4.1LG12g05410.1	G-box	CACGAC	Light responsiveness
Cp4.1LG12g05410.1	G-box	CACGTC	Light responsiveness
Cp4.1LG12g05410.1	G-box	TACGTG	Light responsiveness
Cp4.1LG12g05410.1	AE-box	AGAAACTT	Light responsiveness
Cp4.1LG12g05410.1	AE-box	AGAAACAA	Light responsiveness
Cp4.1LG12g05410.1	chs-CMA1a	TTACTTAA	Light responsiveness
Cp4.1LG12g05410.1	TGACG-motif	TGACG	MeJA-responsiveness
Cp4.1LG12g05410.1	TGACG-motif	TGACG	MeJA-responsiveness
Cp4.1LG12g05410.1	CGTCA-motif	CGTCA	MeJA-responsiveness
Cp4.1LG12g05410.1	CGTCA-motif	CGTCA	MeJA-responsiveness
Cp4.1LG12g05410.1	TCT-motif	TCTTAC	Light responsiveness
Cp4.1LG12g05410.1	GT1-motif	GTGTGTGAA	Light responsiveness
Cp4.1LG12g05410.1	ARE	AAACCA	Anaerobic induction
Cp4.1LG12g05410.1	ARE	AAACCA	Anaerobic induction
Cp4.1LG12g05410.1	GATA-motif	AAGATAAGATT	Light responsiveness
Cp4.1LG12g05410.1	Box 4	ATTAAT	Light responsiveness
Cp4.1LG12g05410.1	Box 4	ATTAAT	Light responsiveness
Cp4.1LG12g05410.1	GARE-motif	TCTGTTG	Gibberellin responsiveness
Cp4.1LG12g05410.1	TCA-element	TCAGAAGAGG	Salicylic acid responsiveness
Cp4.1LG12g05410.1	TCA-element	CCATCTTTTT	Salicylic acid responsiveness
Cp4.1LG12g05410.1	TGA-element	AACGAC	Auxin responsiveness
Cp4.1LG12g05410.1	TGA-element	AACGAC	Auxin responsiveness
Cp4.1LG12g05410.1	G-Box	CACGTT	Light responsiveness
Cp4.1LG12g05410.1	G-Box	CACGTT	Light responsiveness
Cp4.1LG17g00770.1	LTR	CCGAAA	Low-temperature responsiveness
Cp4.1LG17g00770.1	LTR	CCGAAA	Low-temperature responsiveness
Cp4.1LG17g00770.1	GATA-motif	AAGATAAGATT	Light responsiveness
Cp4.1LG17g00770.1	ARE	AAACCA	Anaerobic induction
Cp4.1LG17g00770.1	ARE	AAACCA	Anaerobic induction
Cp4.1LG17g00770.1	ARE	AAACCA	Anaerobic induction
Cp4.1LG17g00770.1	ARE	AAACCA	Anaerobic induction
Cp4.1LG17g00770.1	GA-motif	ATAGATAA	Light responsiveness
Cp4.1LG17g00770.1	TGA-element	AACGAC	Auxin responsiveness
Cp4.1LG17g00770.1	3-AF1 binding site	TAAGAGAGGAA	Light responsiveness
Cp4.1LG17g00770.1	TC-rich repeats	ATTCTCTAAC	Defense and stress responsiveness
Cp4.1LG17g00770.1	TC-rich repeats	ATTCTCTAAC	Defense and stress responsiveness
Cp4.1LG17g00770.1	G-Box	CACGTG	Light responsiveness
Cp4.1LG17g00770.1	G-Box	CACGTT	Light responsiveness
Cp4.1LG17g00770.1	TCCC-motif	TCTCCCT	Light responsiveness
Cp4.1LG17g00770.1	TGACG-motif	TGACG	MeJA-responsiveness
Cp4.1LG17g00770.1	ABRE	CACGTG	Abscisic acid responsiveness
Cp4.1LG17g00770.1	ABRE	ACGTG	Abscisic acid responsiveness
Cp4.1LG17g00770.1	ABRE	ACGTG	Abscisic acid responsiveness
Cp4.1LG17g00770.1	G-box	CACGTG	Light responsiveness
Cp4.1LG17g00770.1	AE-box	AGAAACTT	Light responsiveness
Cp4.1LG17g00770.1	GT1-motif	GGTTAA	Light responsiveness
Cp4.1LG17g00770.1	MRE	AACCTAA	Light responsiveness
Cp4.1LG17g00770.1	CGTCA-motif	CGTCA	MeJA-responsiveness
Cp4.1LG17g00950.1	GT1-motif	GGTTAA	Light responsiveness
Cp4.1LG17g00950.1	MRE	AACCTAA	Light responsiveness
Cp4.1LG17g00950.1	CGTCA-motif	CGTCA	MeJA-responsiveness
Cp4.1LG17g00950.1	TGACG-motif	TGACG	MeJA-responsiveness
Cp4.1LG17g00950.1	G-box	CACGTG	Light responsiveness
Cp4.1LG17g00950.1	ABRE	ACGTG	Abscisic acid responsiveness
Cp4.1LG17g00950.1	ABRE	CACGTG	Abscisic acid responsiveness
Cp4.1LG17g00950.1	ABRE	ACGTG	Abscisic acid responsiveness
Cp4.1LG17g00950.1	ABRE	ACGTG	Abscisic acid responsiveness
Cp4.1LG17g00950.1	AE-box	AGAAACAA	Light responsiveness
Cp4.1LG17g00950.1	AE-box	AGAAACTT	Light responsiveness
Cp4.1LG17g00950.1	TC-rich repeats	ATTCTCTAAC	Defense and stress responsiveness
Cp4.1LG17g00950.1	3-AF1 binding site	TAAGAGAGGAA	Light responsiveness
Cp4.1LG17g00950.1	TGA-element	AACGAC	Auxin responsiveness
Cp4.1LG17g00950.1	G-Box	CACGTT	Light responsiveness
Cp4.1LG17g00950.1	G-Box	CACGTG	Light responsiveness
Cp4.1LG17g00950.1	G-Box	CACGTT	Light responsiveness
Cp4.1LG17g00950.1	TCCC-motif	TCTCCCT	Light responsiveness
Cp4.1LG17g00950.1	LTR	CCGAAA	Low-temperature responsiveness
Cp4.1LG17g00950.1	LTR	CCGAAA	Low-temperature responsiveness
Cp4.1LG17g00950.1	Box 4	ATTAAT	Light responsiveness
Cp4.1LG17g00950.1	Box 4	ATTAAT	Light responsiveness
Cp4.1LG17g00950.1	Box 4	ATTAAT	Light responsiveness
Cp4.1LG17g00950.1	GATA-motif	AAGATAAGATT	Light responsiveness
Cp4.1LG17g00950.1	ARE	AAACCA	Anaerobic induction
Cp4.1LG17g00950.1	ARE	AAACCA	Anaerobic induction
Cp4.1LG17g00950.1	ARE	AAACCA	Anaerobic induction
Cp4.1LG17g00950.1	MBS	CAACTG	Drought-inducibility
Cp4.1LG20g06710.1	TGACG-motif	TGACG	MeJA-responsiveness
Cp4.1LG20g06710.1	TGACG-motif	TGACG	MeJA-responsiveness
Cp4.1LG20g06710.1	P-box	CCTTTTG	Gibberellin responsiveness
Cp4.1LG20g06710.1	P-box	CCTTTTG	Gibberellin responsiveness
Cp4.1LG20g06710.1	AE-box	AGAAACTT	Light responsiveness
Cp4.1LG20g06710.1	G-box	CACGAC	Light responsiveness
Cp4.1LG20g06710.1	MRE	AACCTAA	Light responsiveness
Cp4.1LG20g06710.1	MRE	AACCTAA	Light responsiveness
Cp4.1LG20g06710.1	MRE	AACCTAA	Light responsiveness
Cp4.1LG20g06710.1	CGTCA-motif	CGTCA	MeJA-responsiveness
Cp4.1LG20g06710.1	CGTCA-motif	CGTCA	MeJA-responsiveness
Cp4.1LG20g06710.1	GATA-motif	AAGGATAAGG	Light responsiveness
Cp4.1LG20g06710.1	GATA-motif	AAGGATAAGG	Light responsiveness
Cp4.1LG20g06710.1	Box 4	ATTAAT	Light responsiveness
Cp4.1LG20g06710.1	MBS	CAACTG	Drought-inducibility
Cp4.1LG20g06710.1	MBS	CAACTG	Drought-inducibility
Cp4.1LG20g06710.1	MBS	CAACTG	Drought-inducibility
Cp4.1LG20g06710.1	ARE	AAACCA	Anaerobic induction
Cp4.1LG20g06710.1	GARE-motif	TCTGTTG	Gibberellin responsiveness
Cp4.1LG20g06710.1	TCCC-motif	TCTCCCT	Light responsiveness
Cp4.1LG20g06710.1	TCCC-motif	TCTCCCT	Light responsiveness

## Sheet: Table S4
Table S4 All primers used to construct vectors and identify transgenic plants.
Primer number	Sequence（5′-3′）	Restriction sites	Description
A	ATGGGAGTGCTCGACACTGT		Primers for cloning CmoNHX1 gene
	CTAACAACCAGAACCACTAGGT
B	ATGGGAGTGCTCGACACTGT		Primers for constructing CmoNHX1 subcellular vector
	ACAACCAGAACCACTAGGT
C	CATATGGGAGTGCTCGACACTGT	Nde I	Primers for constructing CmoNHX1-overexpressed vector
	GGATCCCTAACAACCAGAACCACTAGGT	BamH I
D	AGGATGGGCTTCCATGGTCTG		Quantitative real-time PCR analysis for CmoNHX1
	CCTTCCCCAAAGACTAGAC
E	GGTCGCGGAGGCTATGGATGC		Primer for detecting hygromycin resistance gene of positive seedling
	GCTTCTGCGGGCGATTTGTGT
Note: The red font indicates the restriction site.
